# Supplementary material
Source: Research Square preprint supplement (doi:10.21203/rs.3.rs-9810404/v1)

Figure 5C

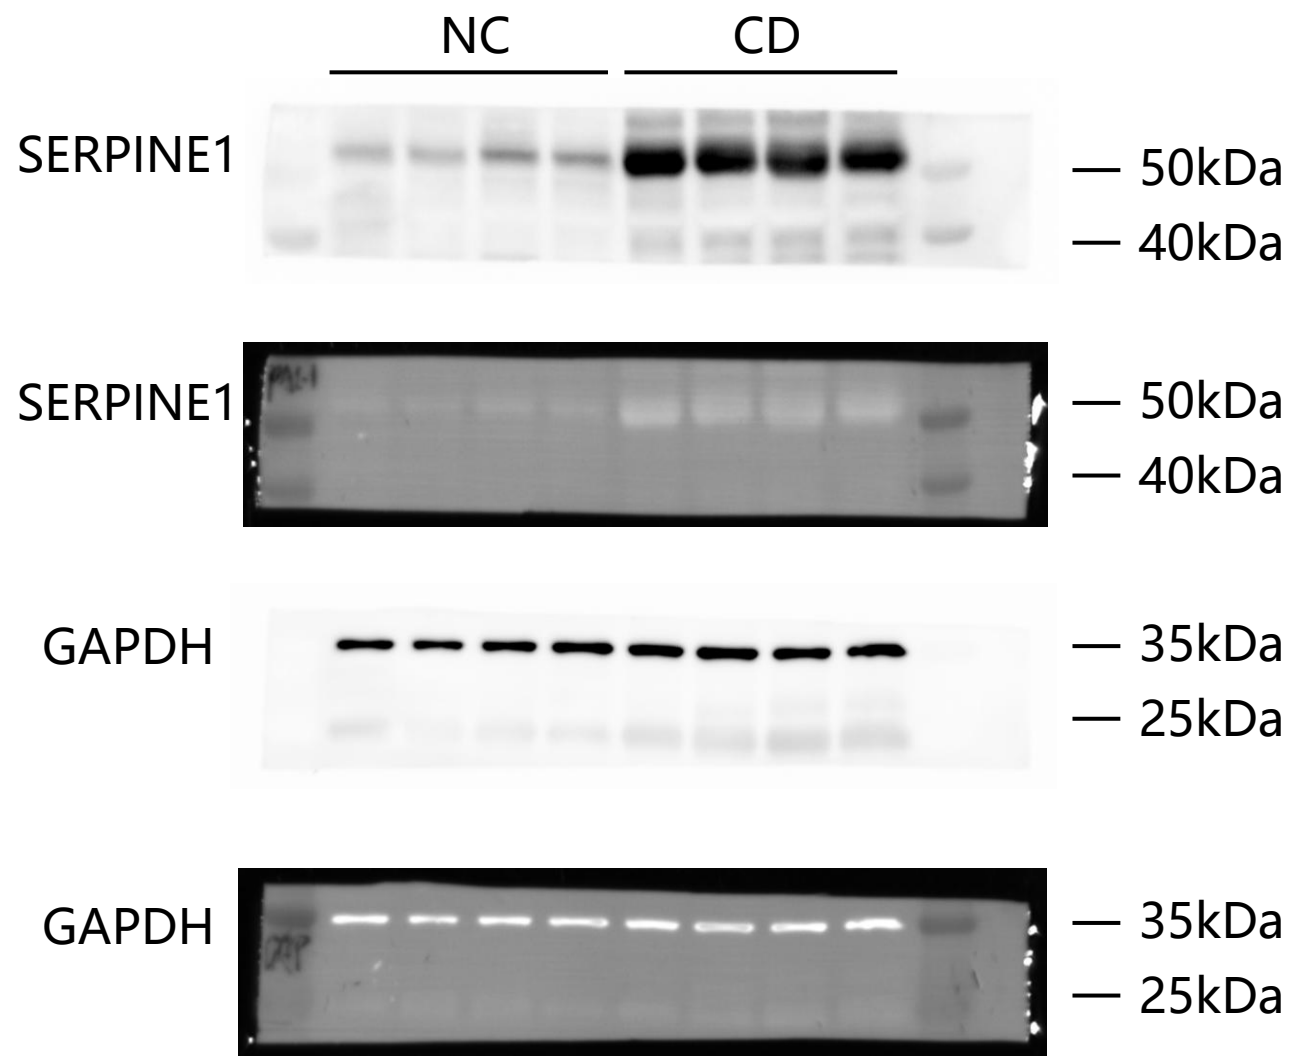

Figure 5E

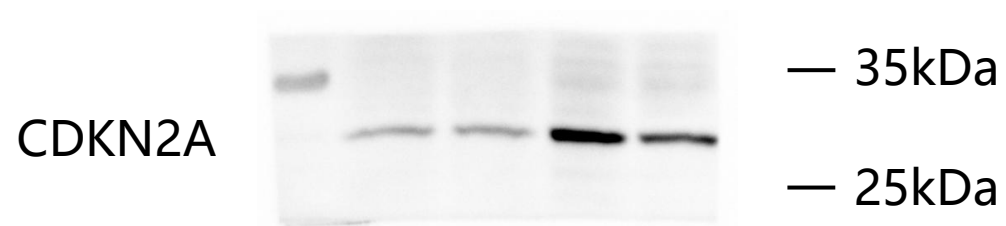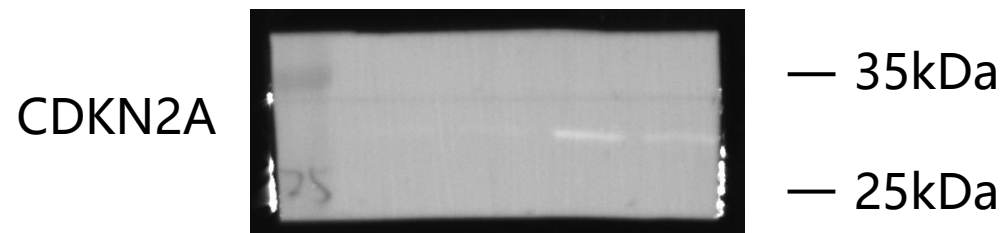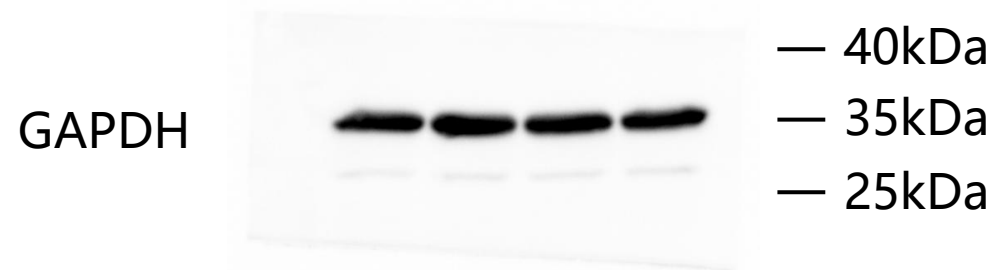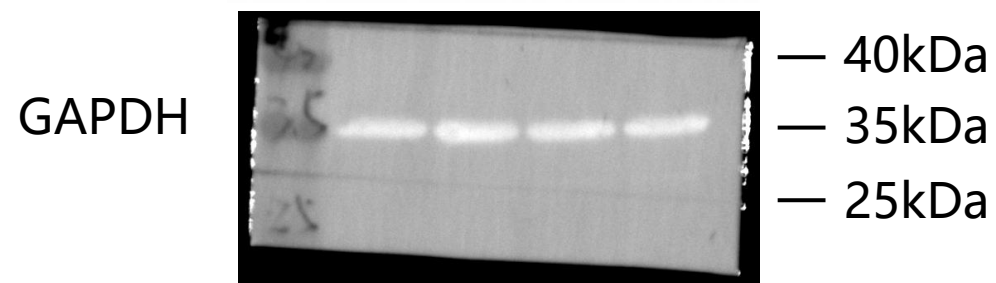

SERPINE1

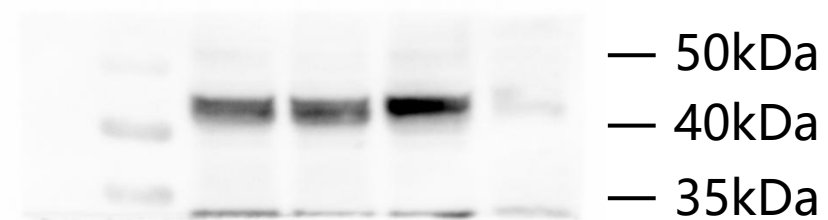

SERPINE1

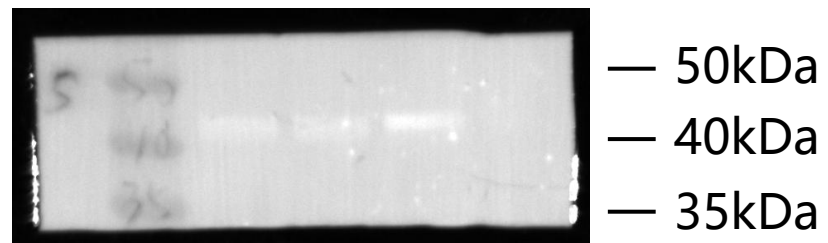

CDKN1A

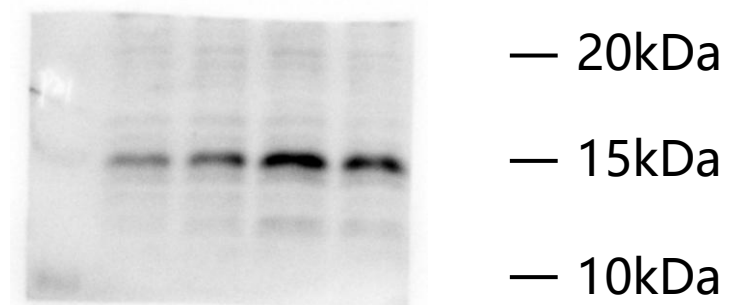

CDKN1A

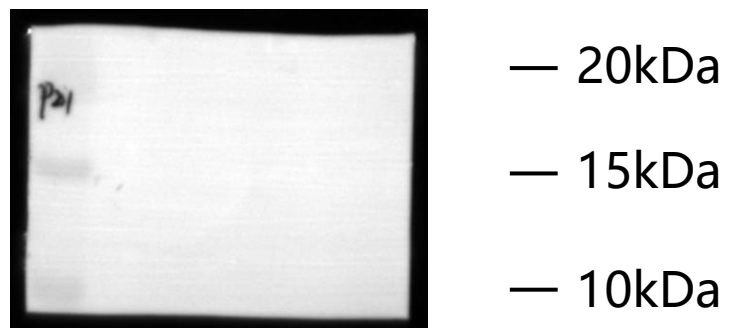

Figure 5H

|             |   |   |   |   |   |   |
|-------------|---|---|---|---|---|---|
| Co-Culture  | + | - | + | - | + | - |
| Si-NC       | + | + | - | - | - | - |
| Si-SERPINE1 | - | - | + | + | - | - |
| TM5441      | - | - | - | - | + | + |

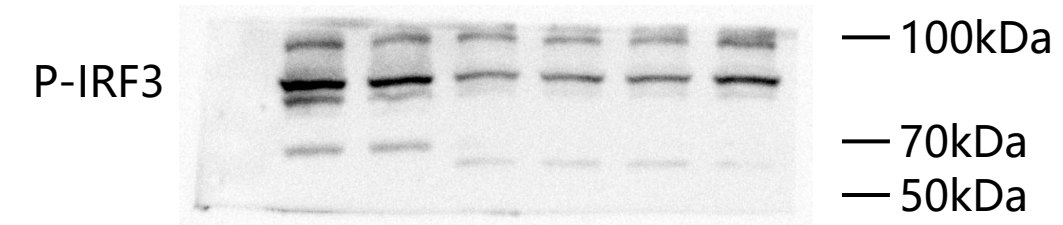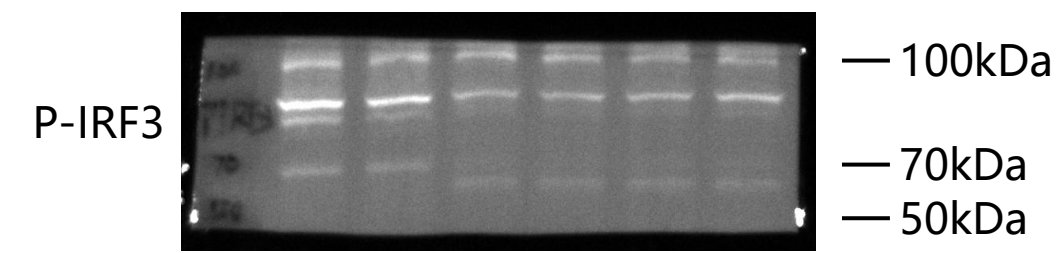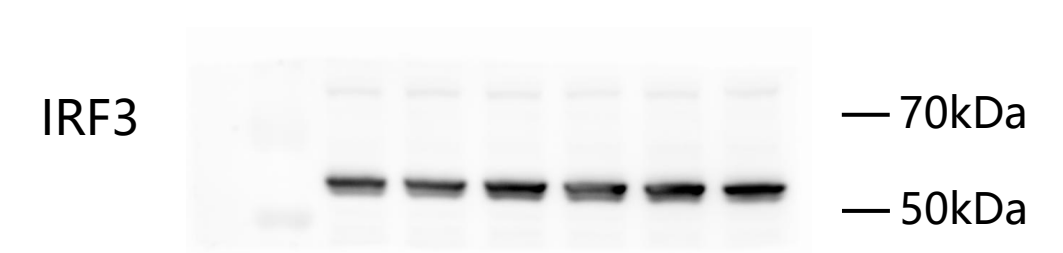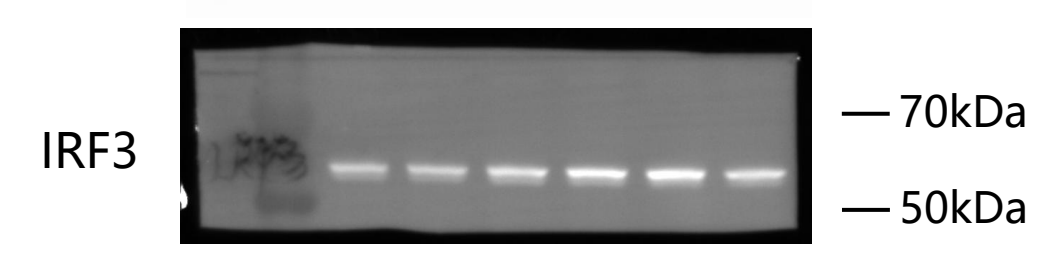

|             |   |   |   |   |   |   |
|-------------|---|---|---|---|---|---|
| Co-Culture  | + | - | + | - | + | - |
| Si-NC       | + | + | - | - | - | - |
| Si-SERPINE1 | - | - | + | + | - | - |
| TM5441      | - | - | - | - | + | + |

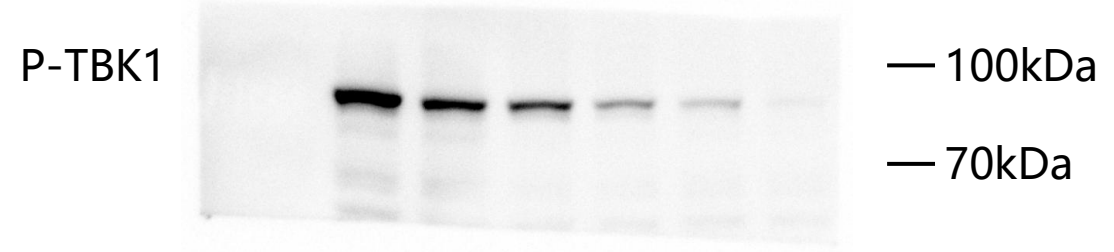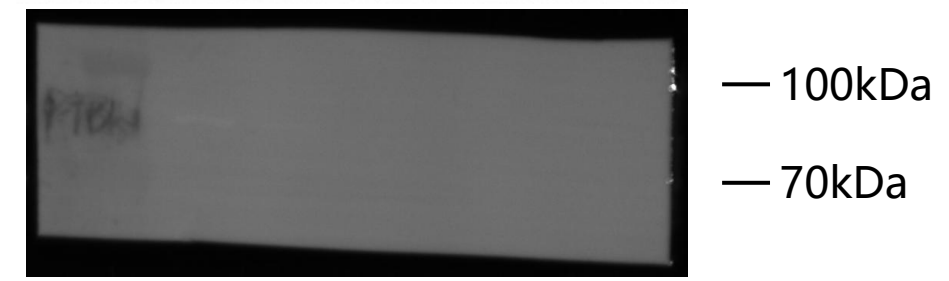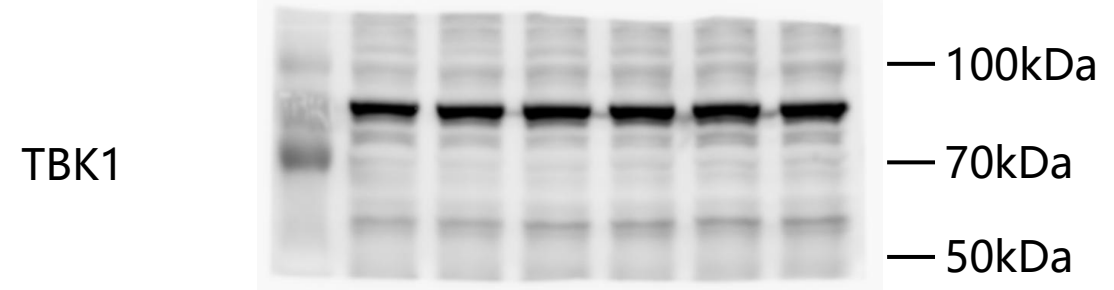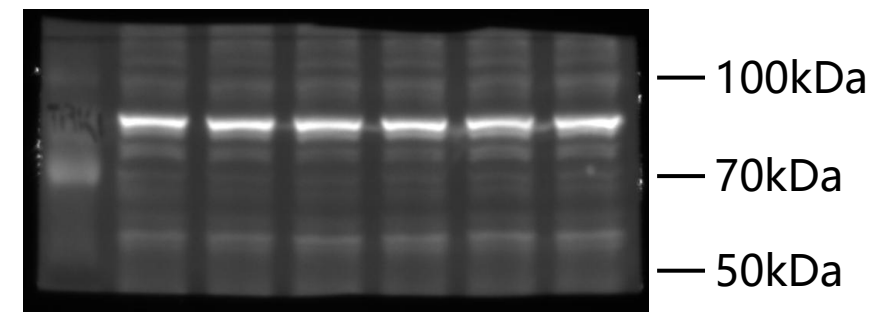

Figure 5H

|             |   |   |   |   |   |   |
|-------------|---|---|---|---|---|---|
| Co-Culture  | + | - | + | - | + | - |
| Si-NC       | + | + | - | - | - | - |
| Si-SERPINE1 | - | - | + | + | - | - |
| TM5441      | - | - | - | - | + | + |

|             |   |   |   |   |   |   |
|-------------|---|---|---|---|---|---|
| Co-Culture  | + | - | + | - | + | - |
| Si-NC       | + | + | - | - | - | - |
| Si-SERPINE1 | - | - | + | + | - | - |
| TM5441      | - | - | - | - | + | + |

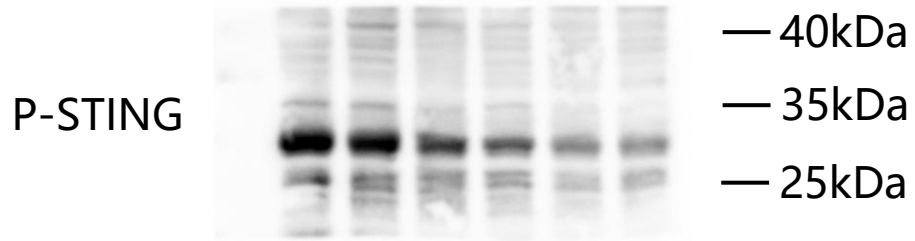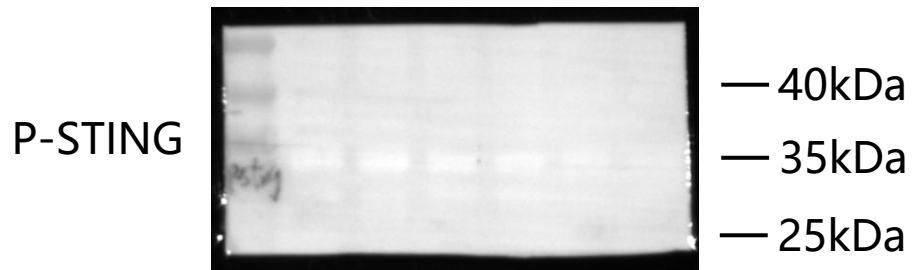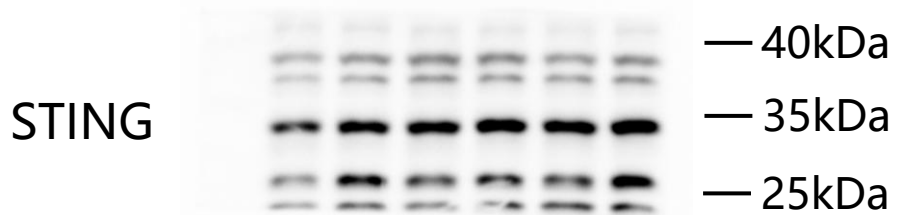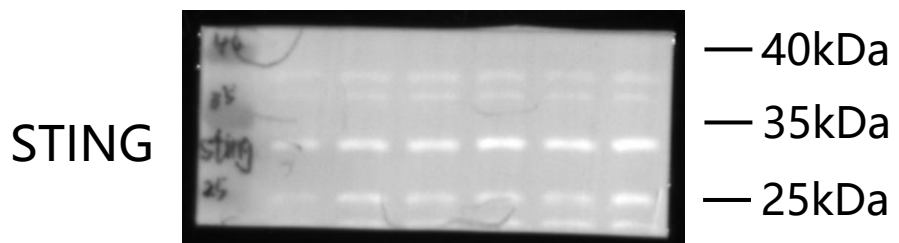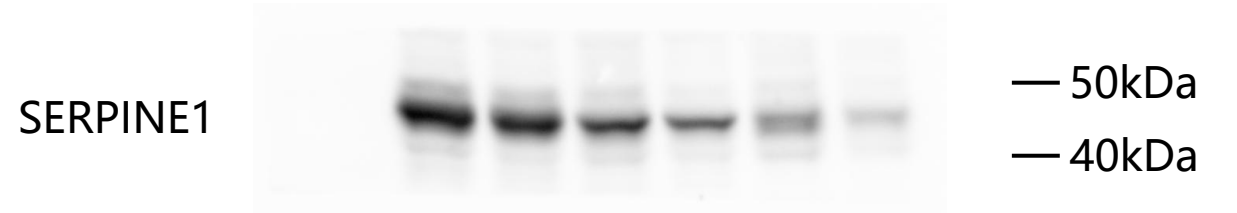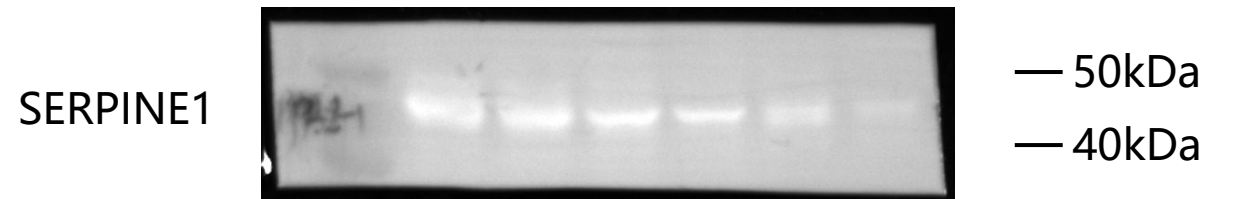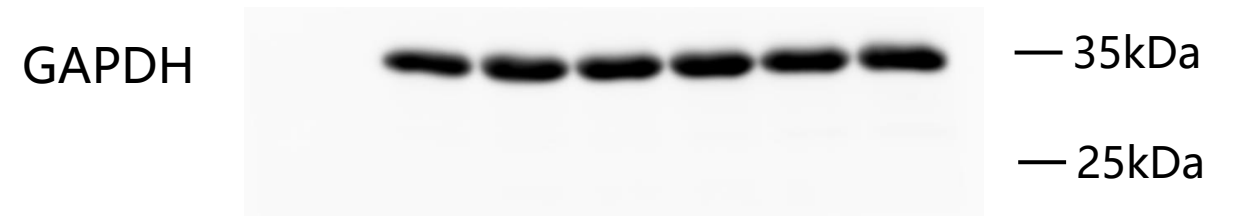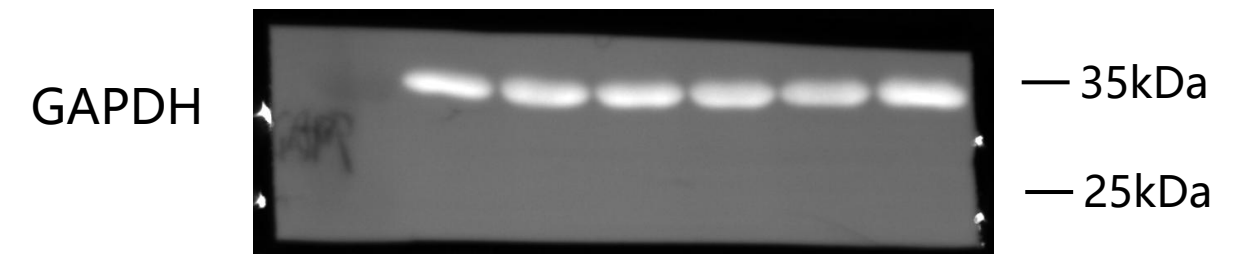

Figure 5J

|               |   |   |   |   |
|---------------|---|---|---|---|
| Flag-SERPINE1 | - | - | + | + |
| Vector        | + | + | - | - |
| C170          | - | + | - | + |

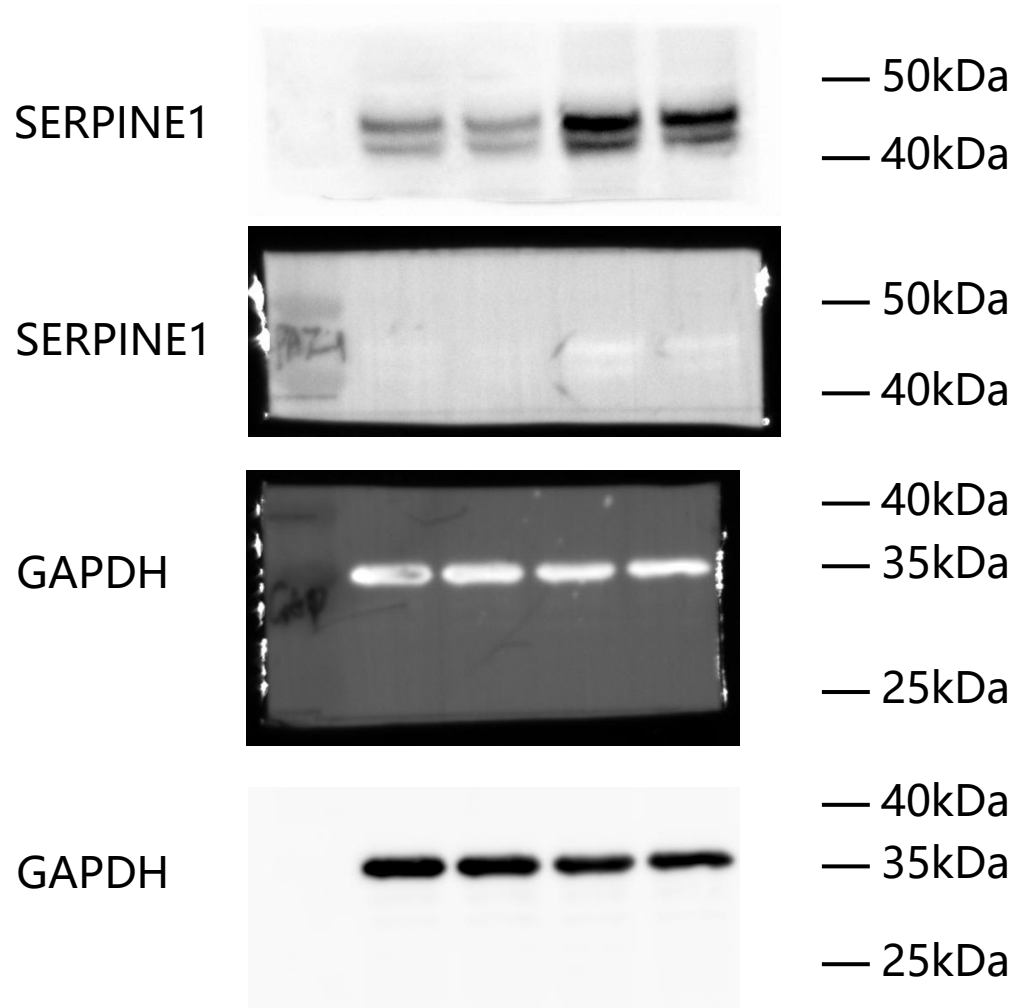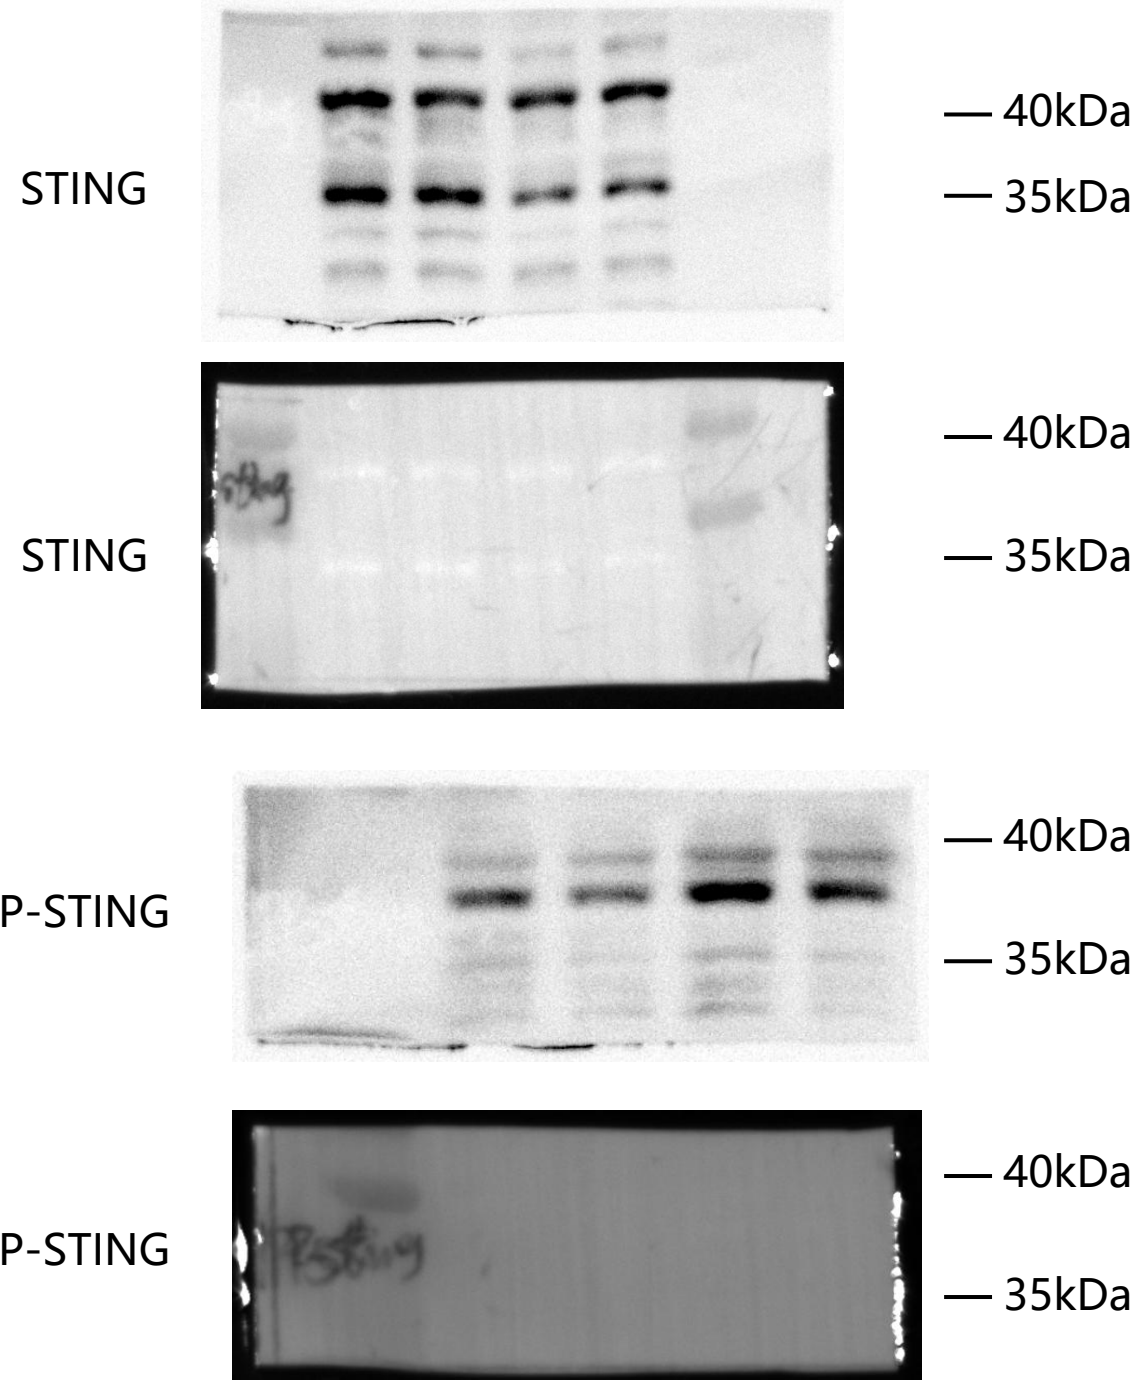

Figure 5J

|               |   |   |   |   |
|---------------|---|---|---|---|
| Flag-SERPINE1 | - | - | + | + |
| Vector        | + | + | - | - |
| C170          | - | + | - | + |

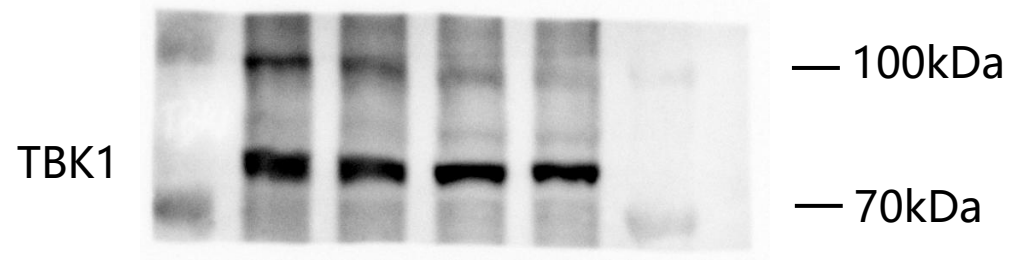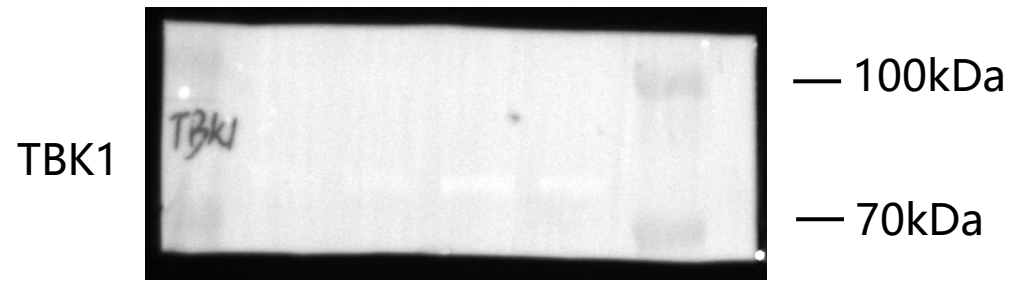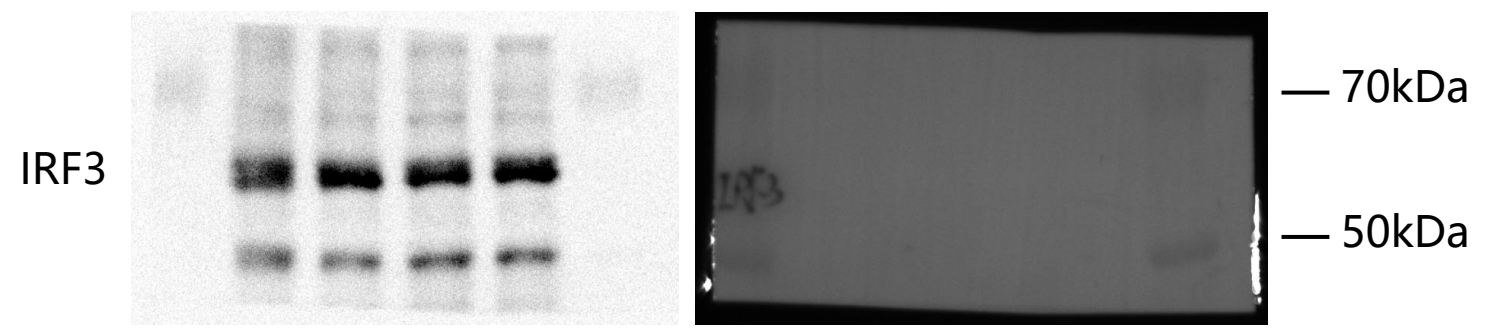

P-IRF3

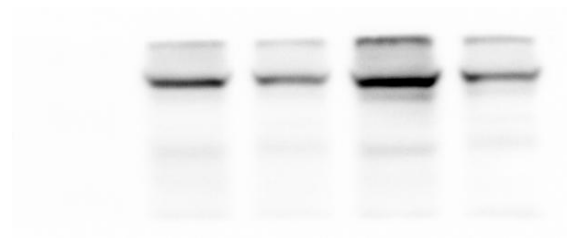

P-IRF3

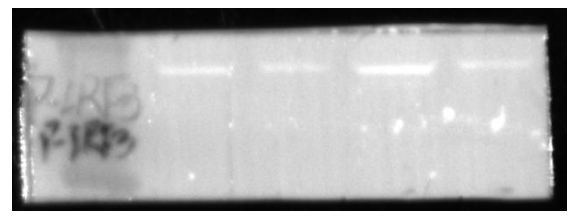

P-TBK1

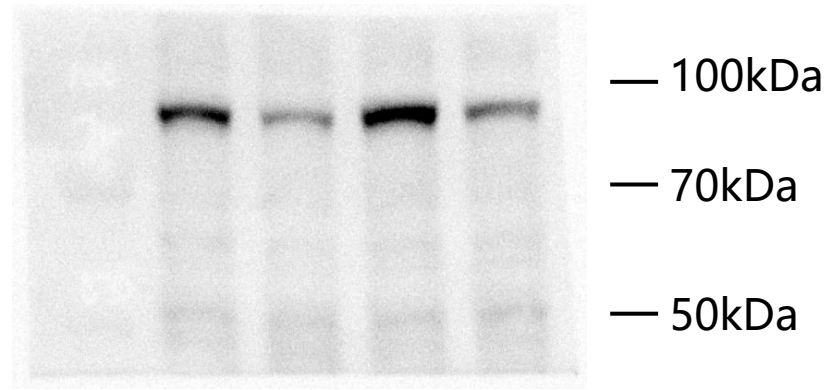

P-TBK1

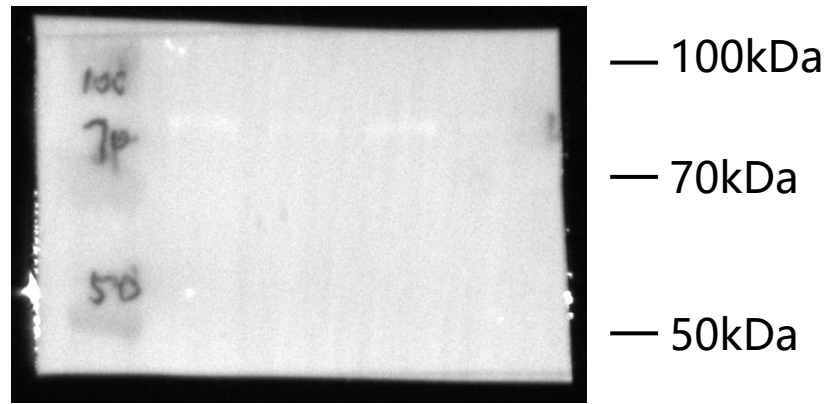

Figure 5J

|               |   |   |   |   |
|---------------|---|---|---|---|
| Flag-SERPINE1 | - | - | + | + |
| Vector        | + | + | - | - |
| C170          | - | + | - | + |

p21

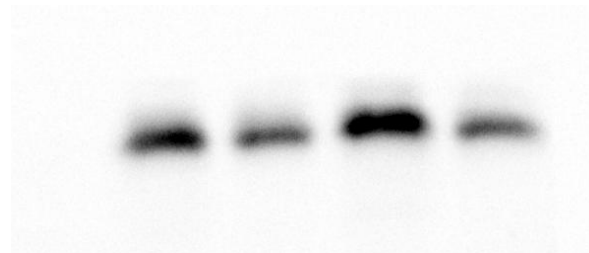

— 20kDa

— 15kDa

p21

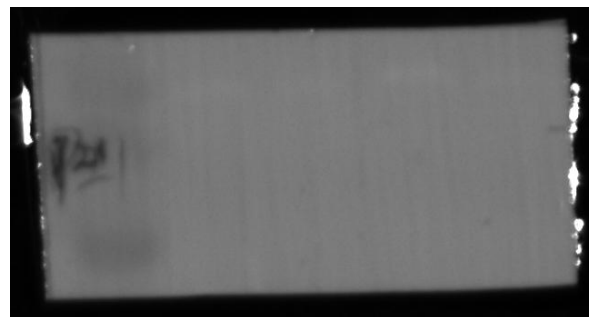

— 20kDa

— 15kDa

GAPDH

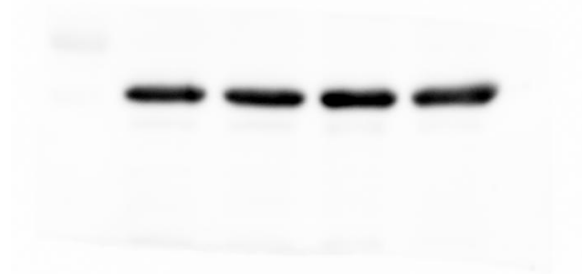

— 40kDa

— 35kDa

— 25kDa

GAPDH

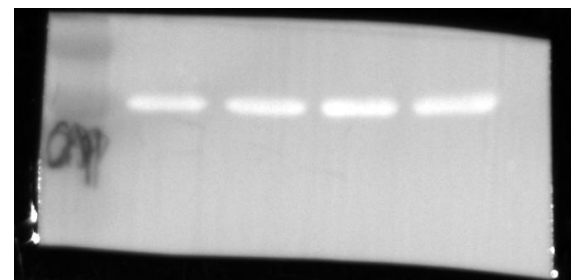

— 40kDa

— 35kDa

— 25kDa

Figure 6G

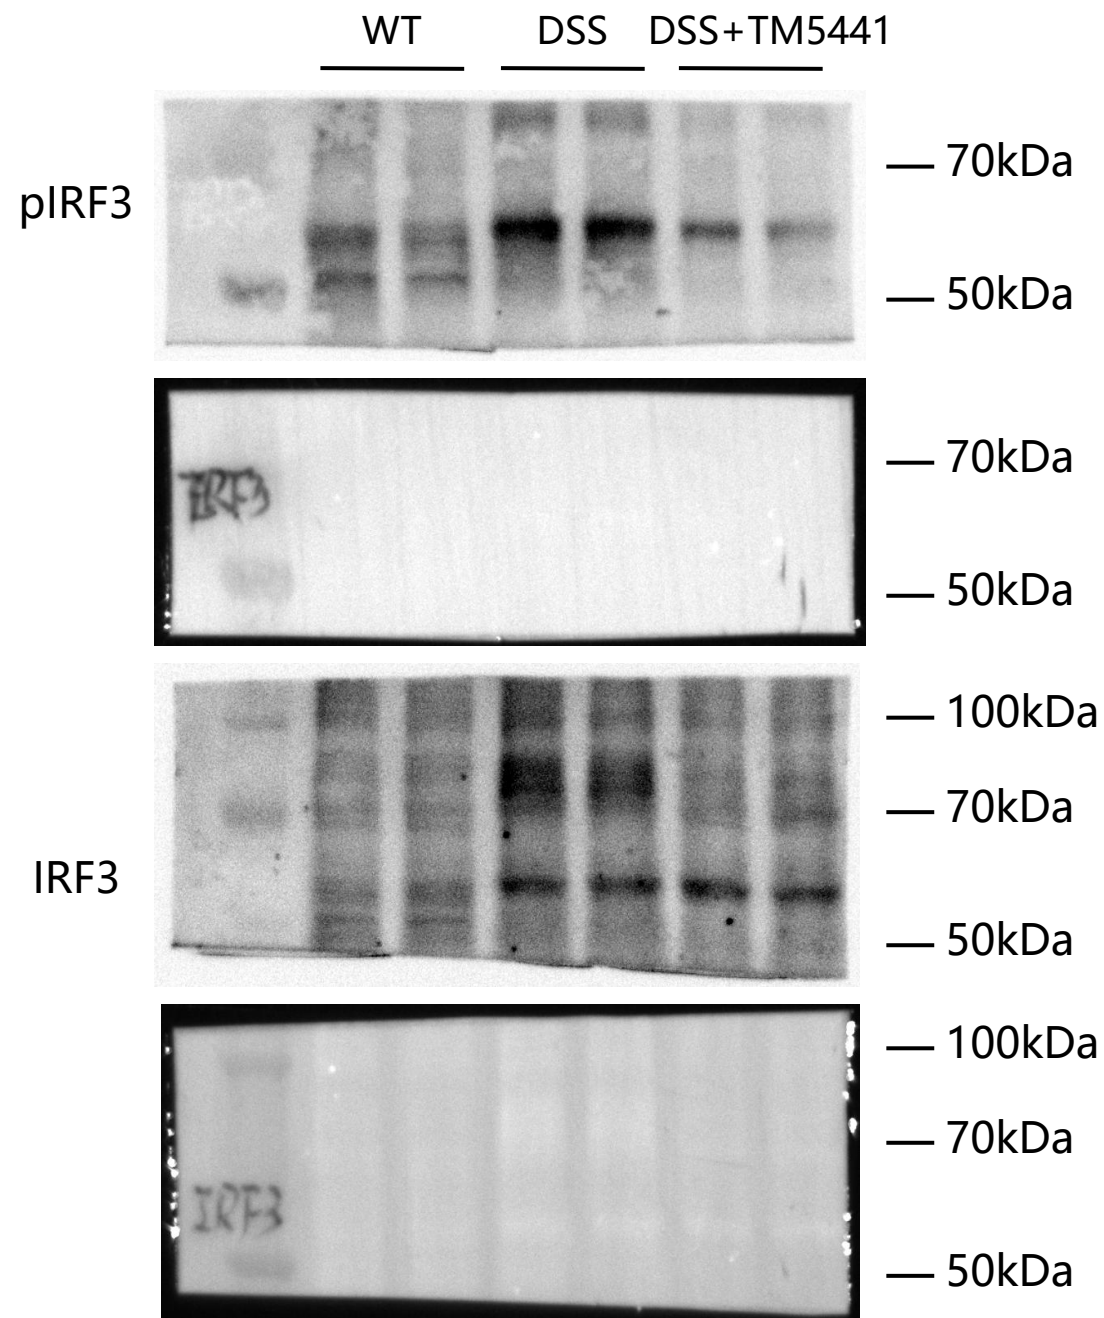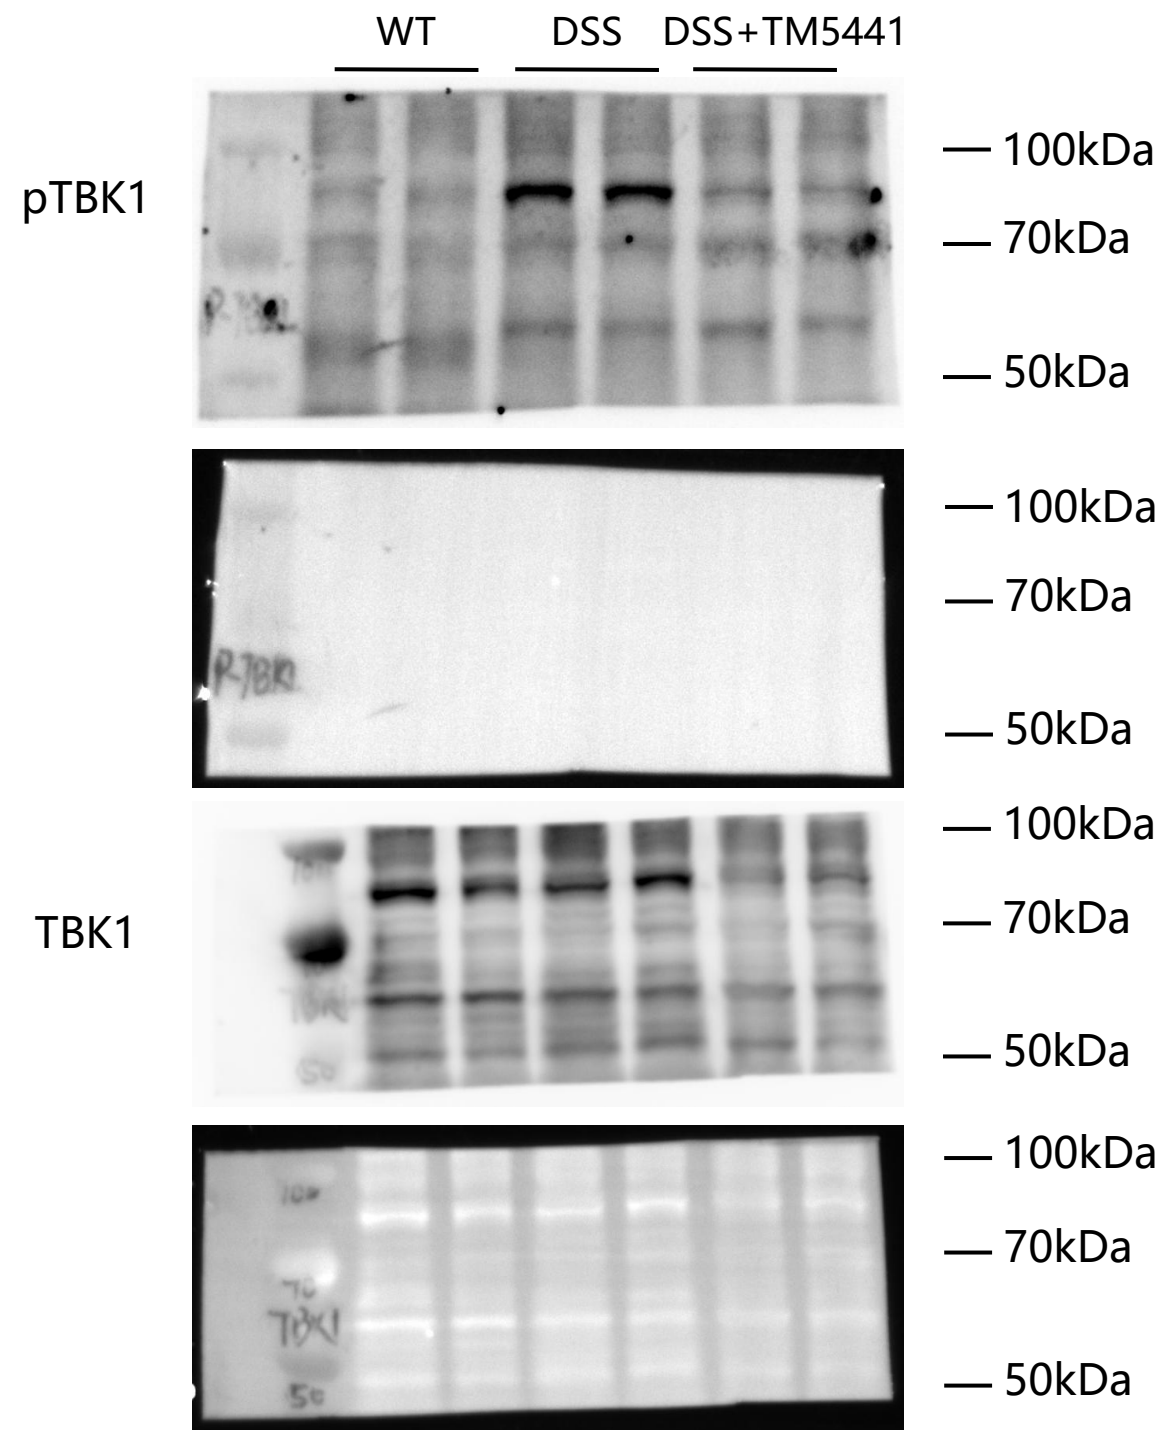

Figure 6G

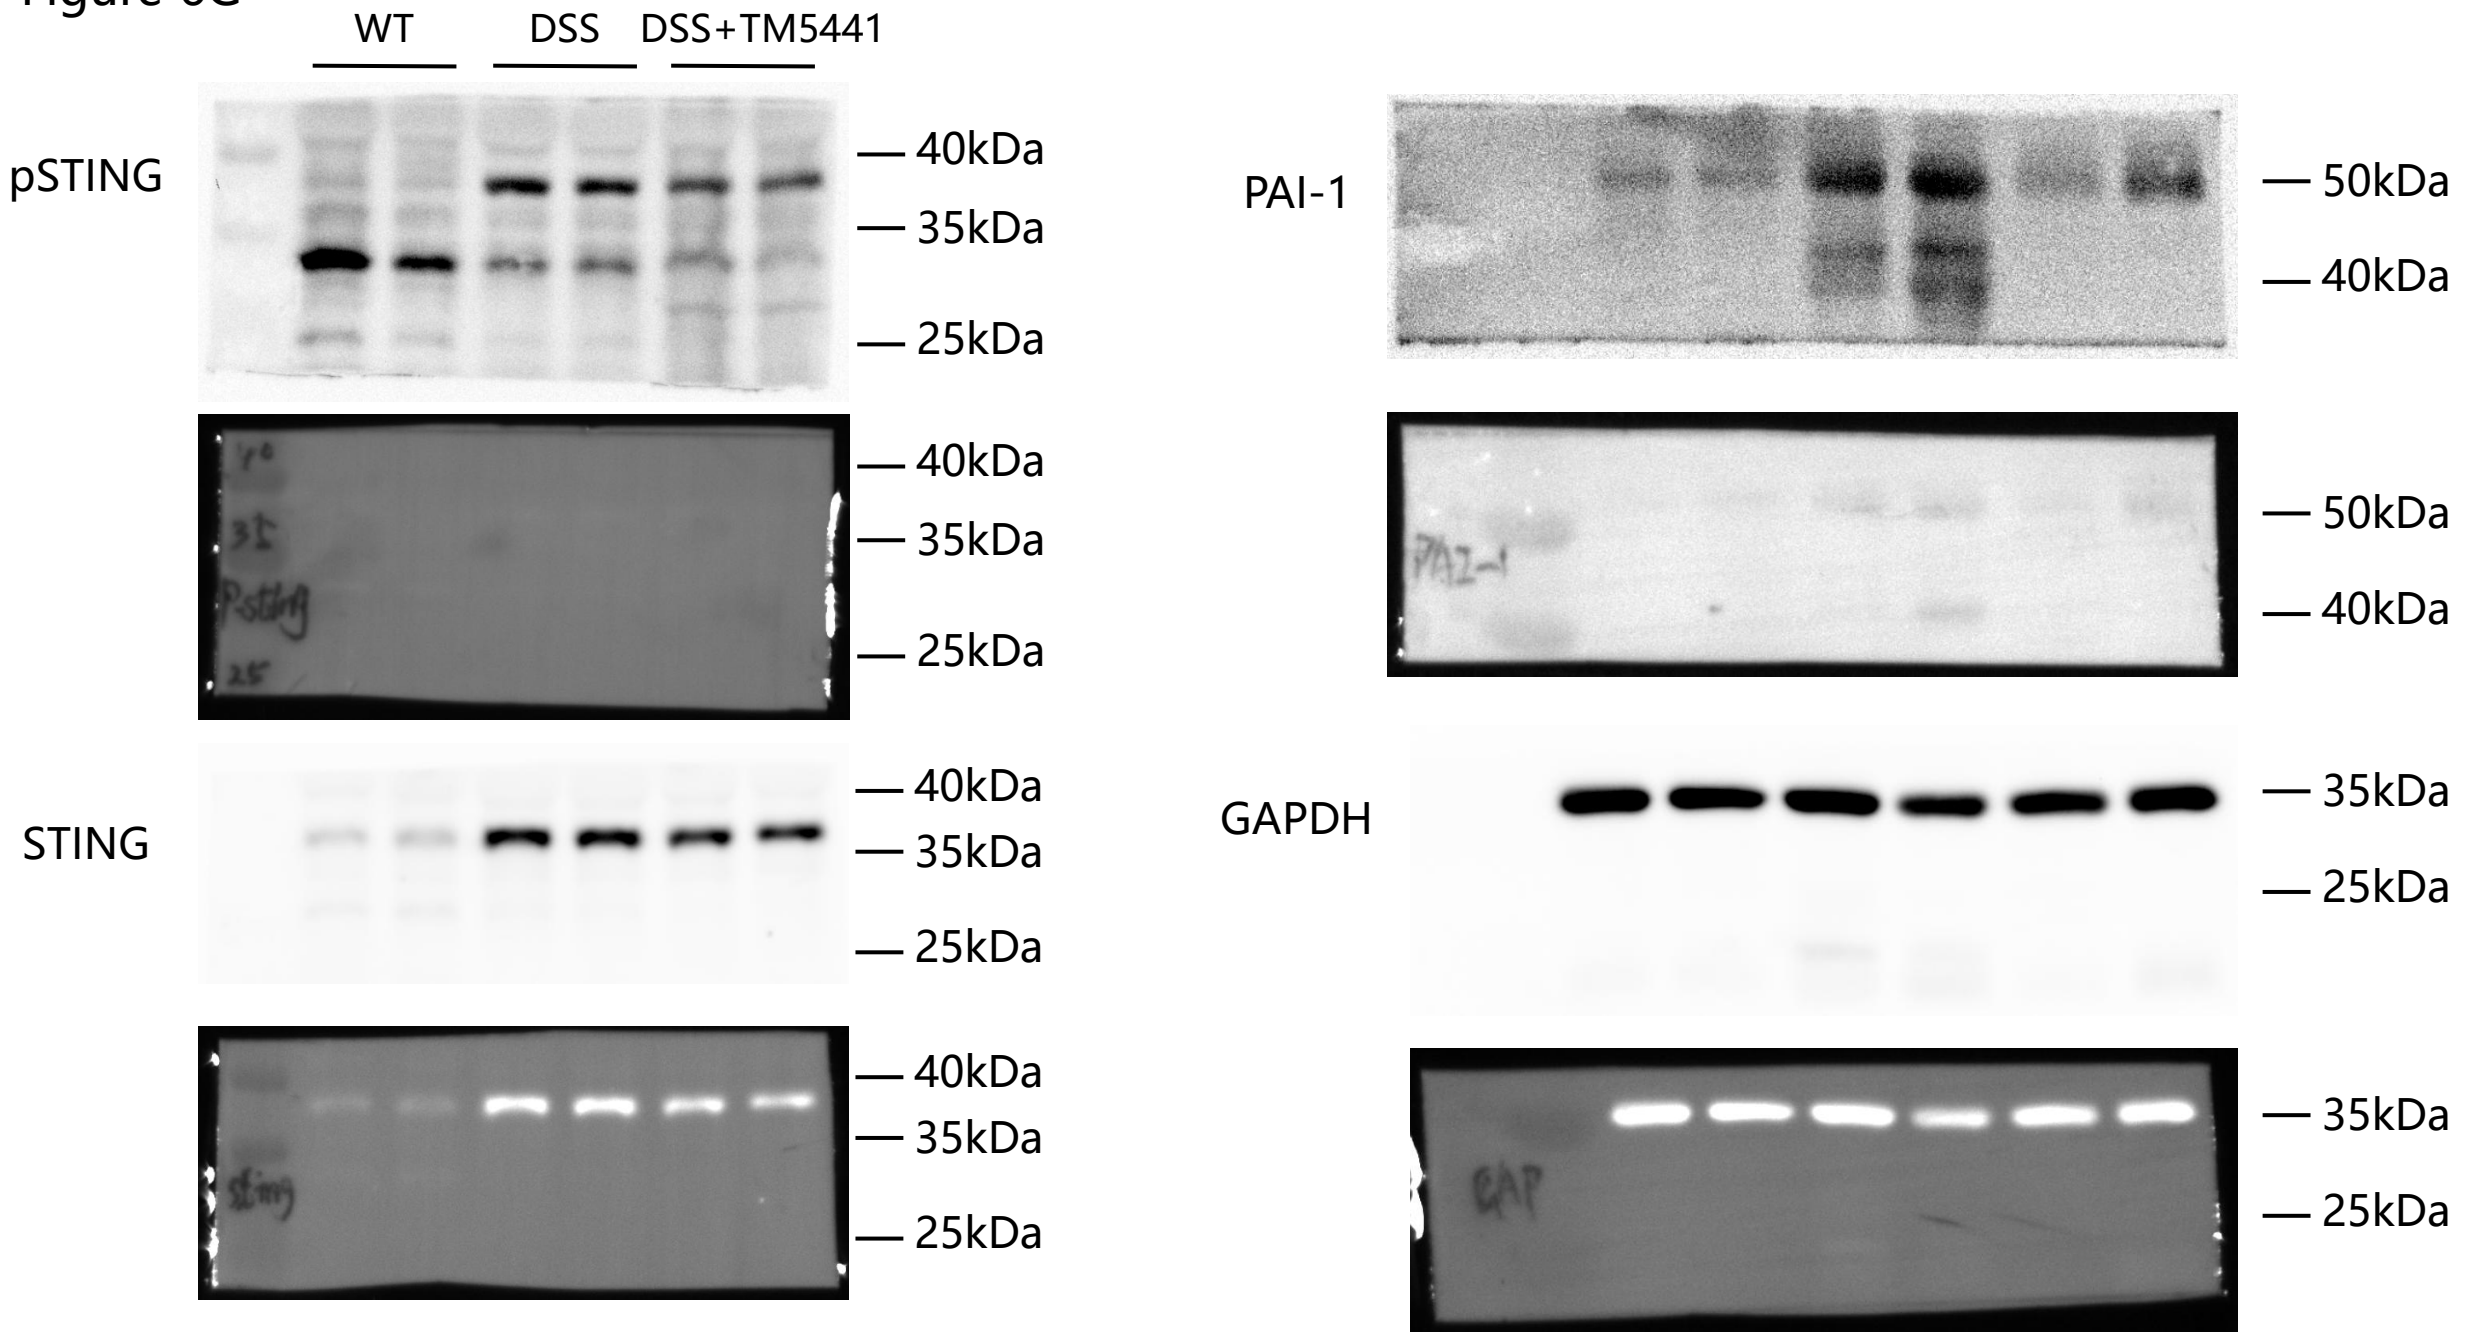

Supplement: Supplementary file 2 [file 5666d8e11907b9742292a734.pdf]
