# Supplementary material
Source: Research Square preprint supplement (doi:10.21203/rs.3.rs-9810404/v1)
Supplement: Supplementary file 4 [file 7e09cefb8fe095e51fc871ea.docx]

**qPCR primers used in this study:**

| Gene name | Forward | Reverse |
| --- | --- | --- |
| SERPINE1 | CTCATCAGCCACTGGAAAGGCA | GACTCGTGAAGTCAGCCTGAAAC |
| IL6 | AGACAGCCACTCACCTCTTCAG | TTCTGCCAGTGCCTCTTTGCTG |
| IL8 | GAGAGTGATTGAGAGTGGACCAC | CACAACCCTCTGCACCCAGTTT |
| CCL2 | AGAATCACCAGCAGCAAGTGTCC | TCCTGAACCCACTTCTGCTTGG |
| CXCL1 | AGCTTGCCTCAATCCTGCATCC | TCCTTCAGGAACAGCCACCAGT |
| CXCL10 | GGTGAGAAGAGATGTCTGAATCC | GTCCATCCTTGGAAGCACTGCA |
| CCL5 | CCTGCTGCTTTGCCTACATTGC | ACACACTTGGCGGTTCTTTCGG |
| CD86 | CCATCAGCTTGTCTGTTTCATTCC | GCTGTAATCCAAGGAATGTGGTC |
| iNOS | GCTCTACACCTCCAATGTGACC | CTGCCGAGATTTGAGCCTCATG |
| TNFa | CTCTTCTGCCTGCTGCACTTTG | ATGGGCTACAGGCTTGTCACTC |
| IL1B | TGGACCTTCCAGGATGAGGACA | GTTCATCTCGGAGCCTGTAGTG |

**siRNAs used in this study**

| Target gene | Sense sequence (5'→3') |
| --- | --- |
| SERPINE1 | CAg CAg AUU CAA gCA gCU A/dT//dT/ |
