# Supplementary material
Source: Research Square preprint supplement (doi:10.21203/rs.3.rs-9810404/v1)
Supplement: Supplementary file 5 [file a5985d79c656fca12510e239.docx]

# Supplemental Figures

**Supplementary Figure 1.**


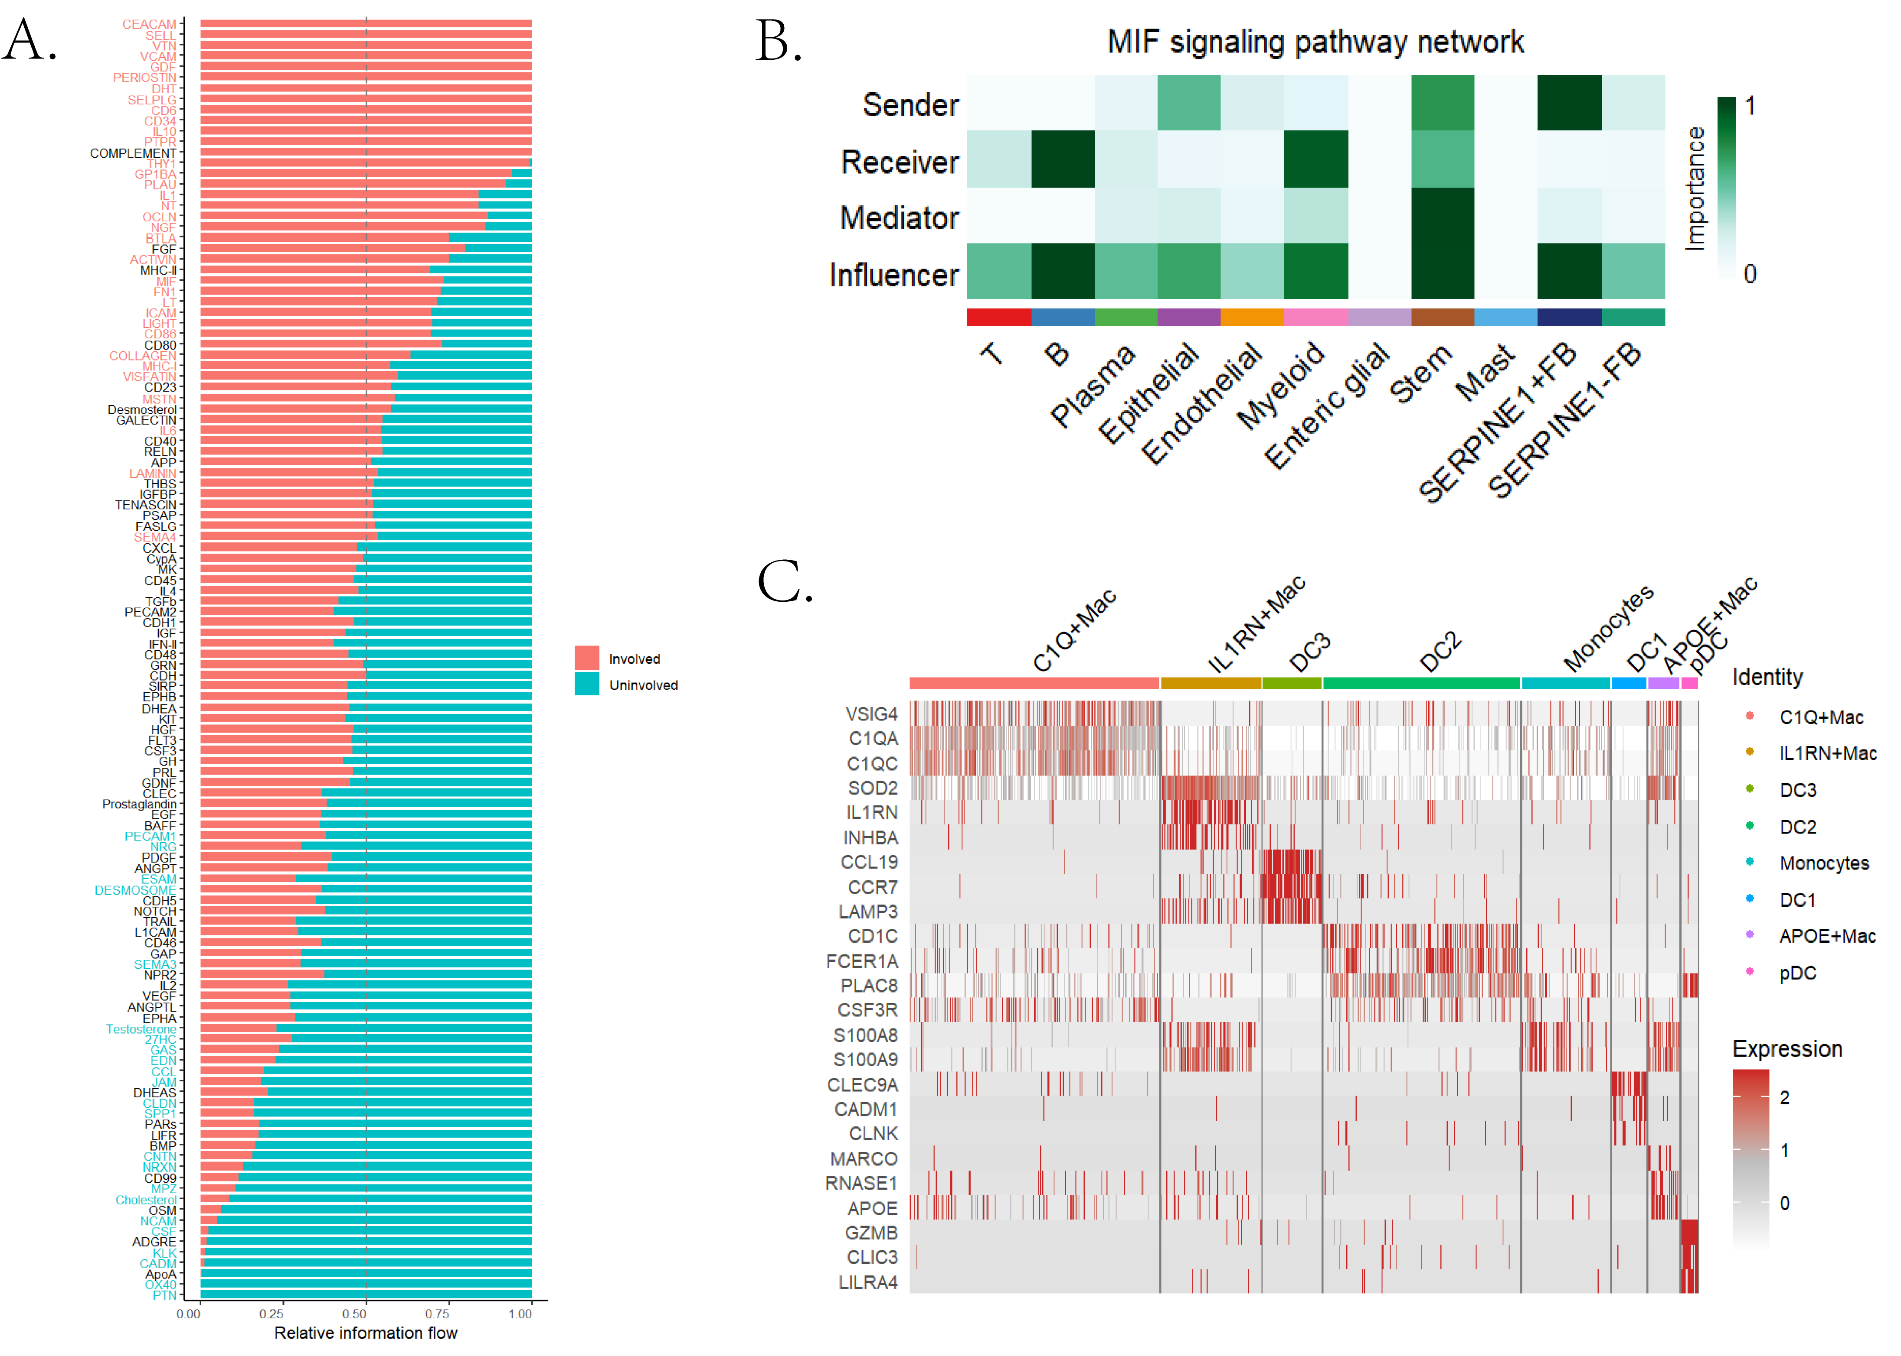


**Supplementary Figure 1. SERPINE1⁺ fibroblasts represent inflammation- specific senescent cells driving disease pathogenesis.** (A) CellChat analysis comparing intercellular signaling flow between inflamed and non-inflamed Crohn's disease tissues. (B) CellChat-predicted MIF signaling network showing cell population roles as Senders, Receivers, Mediators, and Influencers in Crohn's disease. (C) Heatmap of marker gene expression across myeloid cell subpopulations.

## Supplementary Figure 2.


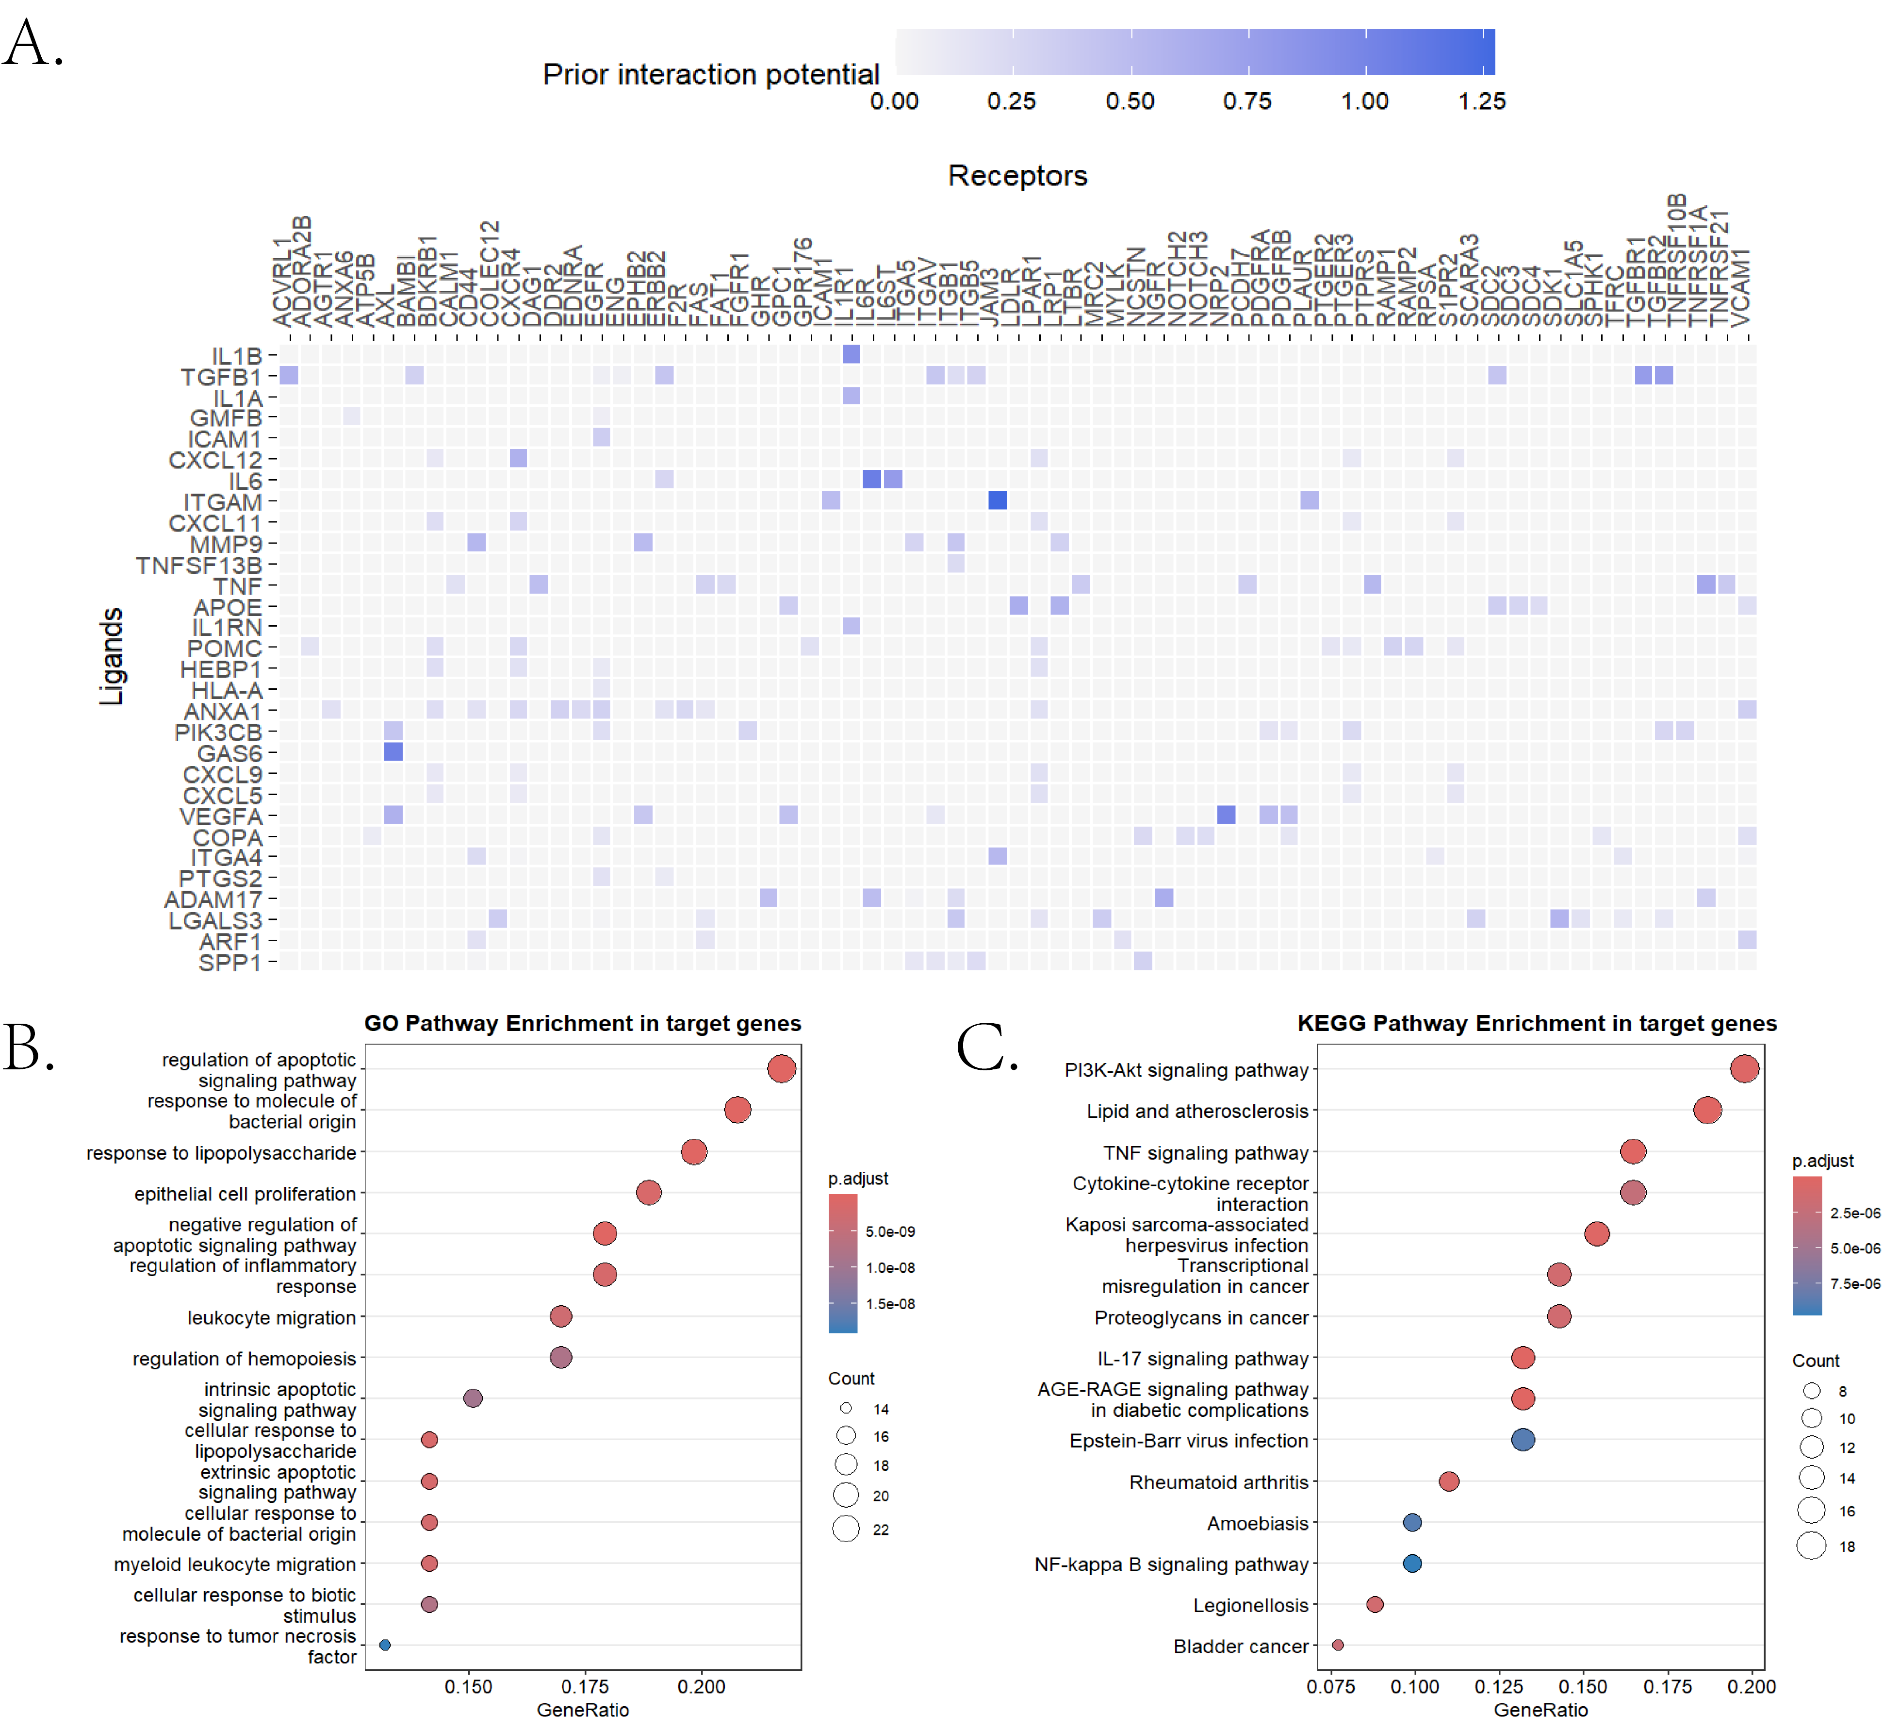


**Supplementary Figure 2. IL1RN+ Macrophages Drive Fibroblasts Senescence via TNF-α Signaling.** (A) Heatmap of NicheNet-predicted ligand-to-receptor interaction potential for myeloid ligands targeting fibroblasts. (B-C) GO and KEGG enrichment analyses of NicheNet-predicted target genes.

## Supplementary Figure 3.


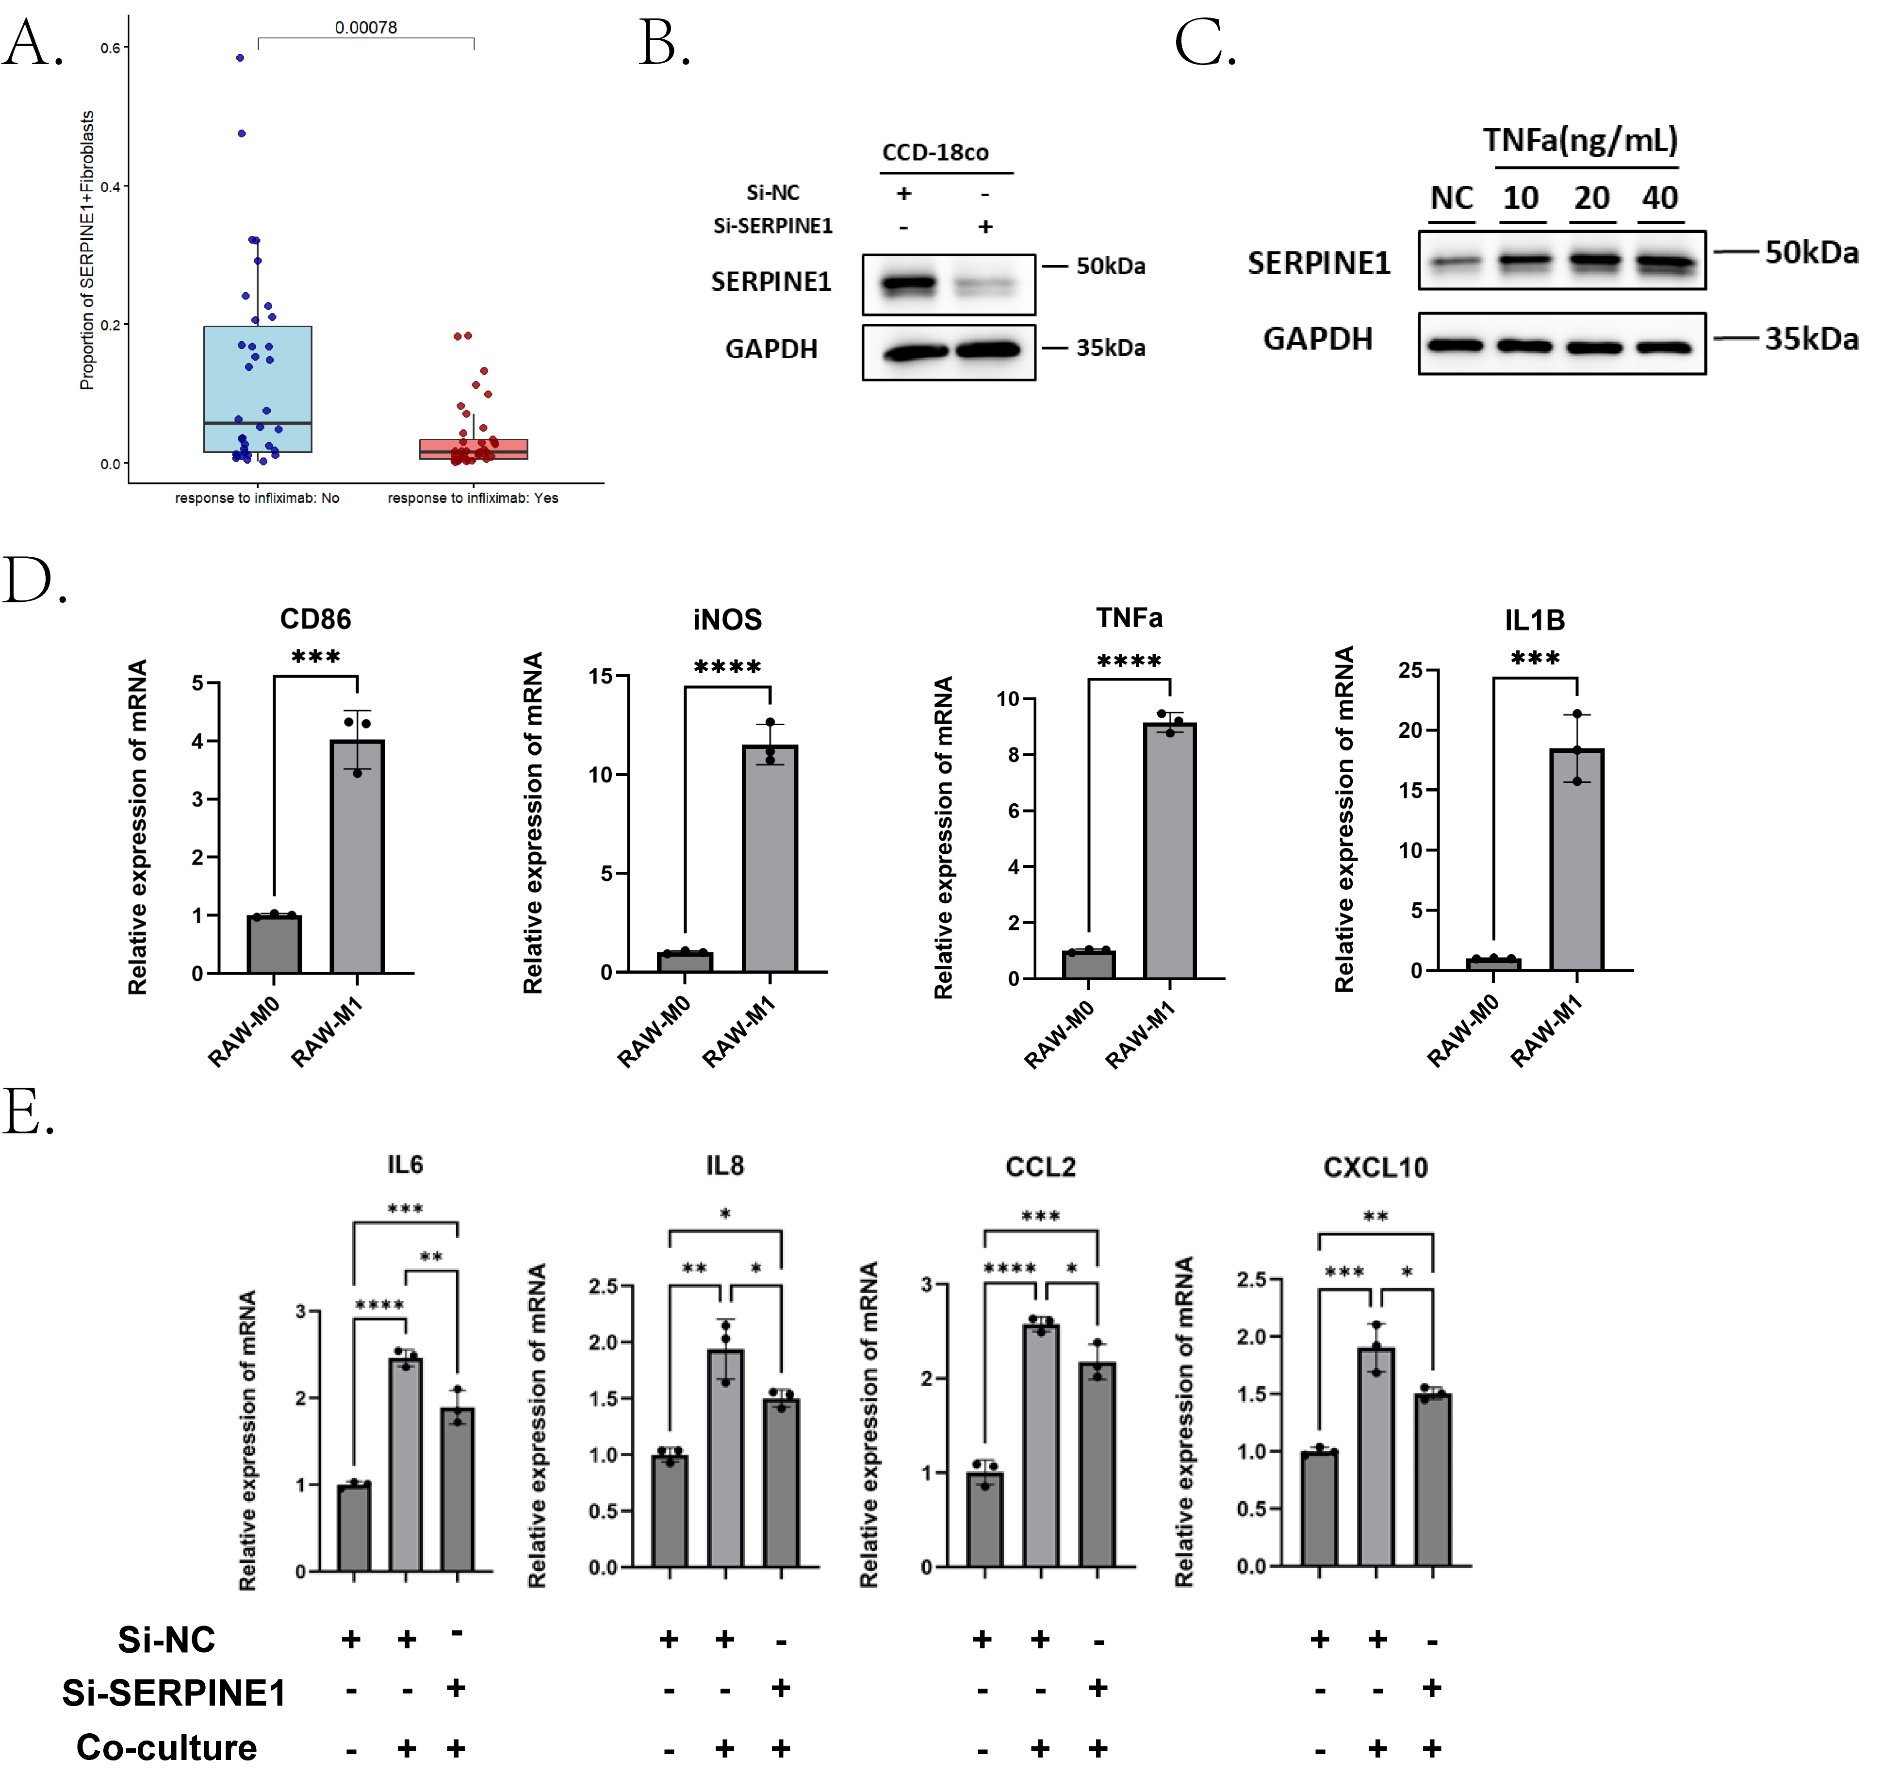


**Supplementary Figure 3. SERPINE1 drives cGAS-STING-mediated cellular senescence and pro-inflammatory signaling in Crohn's disease.** (A) CIBERSORTx analysis of GSE16879 showing SERPINE1⁺ fibroblast proportions in ulcerative colitis patients stratified by infliximab response status (p = 7.8 × 10⁻⁴, effect size = 0.6). (B) Knockdown of SERPINE1 in CCD-18co cells confirmed by Western blot. (C) ) TNF-α concentration-dependently induces SERPINE1 upregulation. (D) qPCR confirmation of M1 polarization: CD86, iNOS, TNF-α and IL-1β are sharply up-regulated in FIB-primed macrophages after LPS stimulation (***P < 0.001). (E) SERPINE1 knockdown suppresses M1 macrophage-fibroblast co-culture-induced inflammatory SASP expression.
