# Supplementary material
Source: Research Square preprint supplement (doi:10.21203/rs.3.rs-9810404/v1)

**A.**

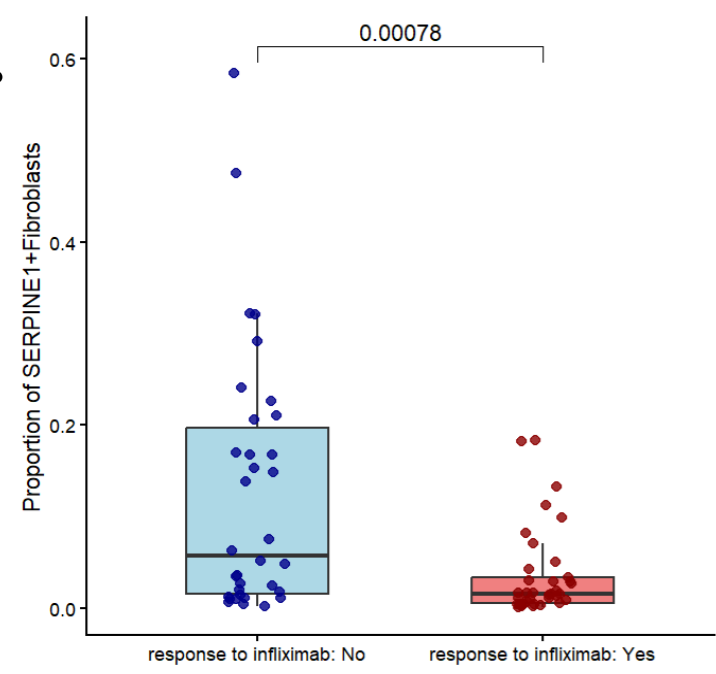

**B.**

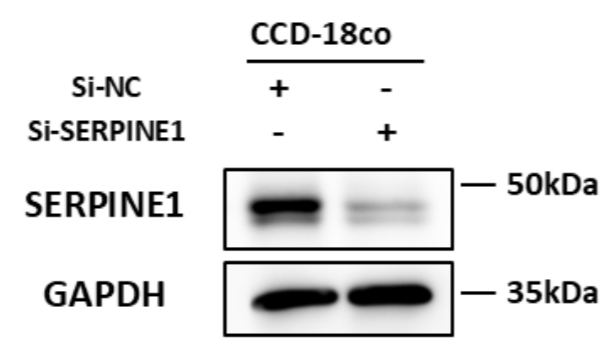

**C.**

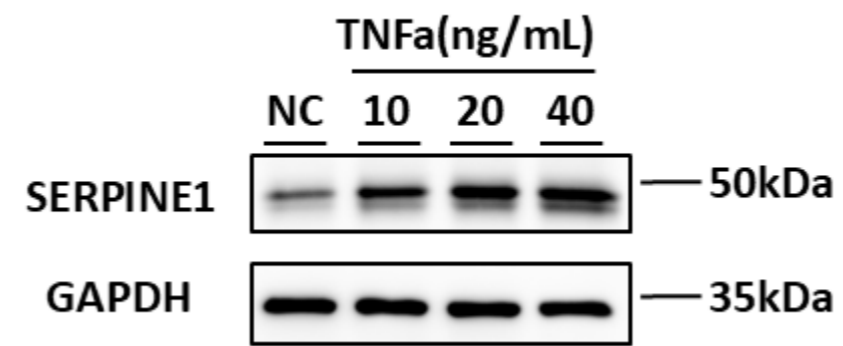

**D.**

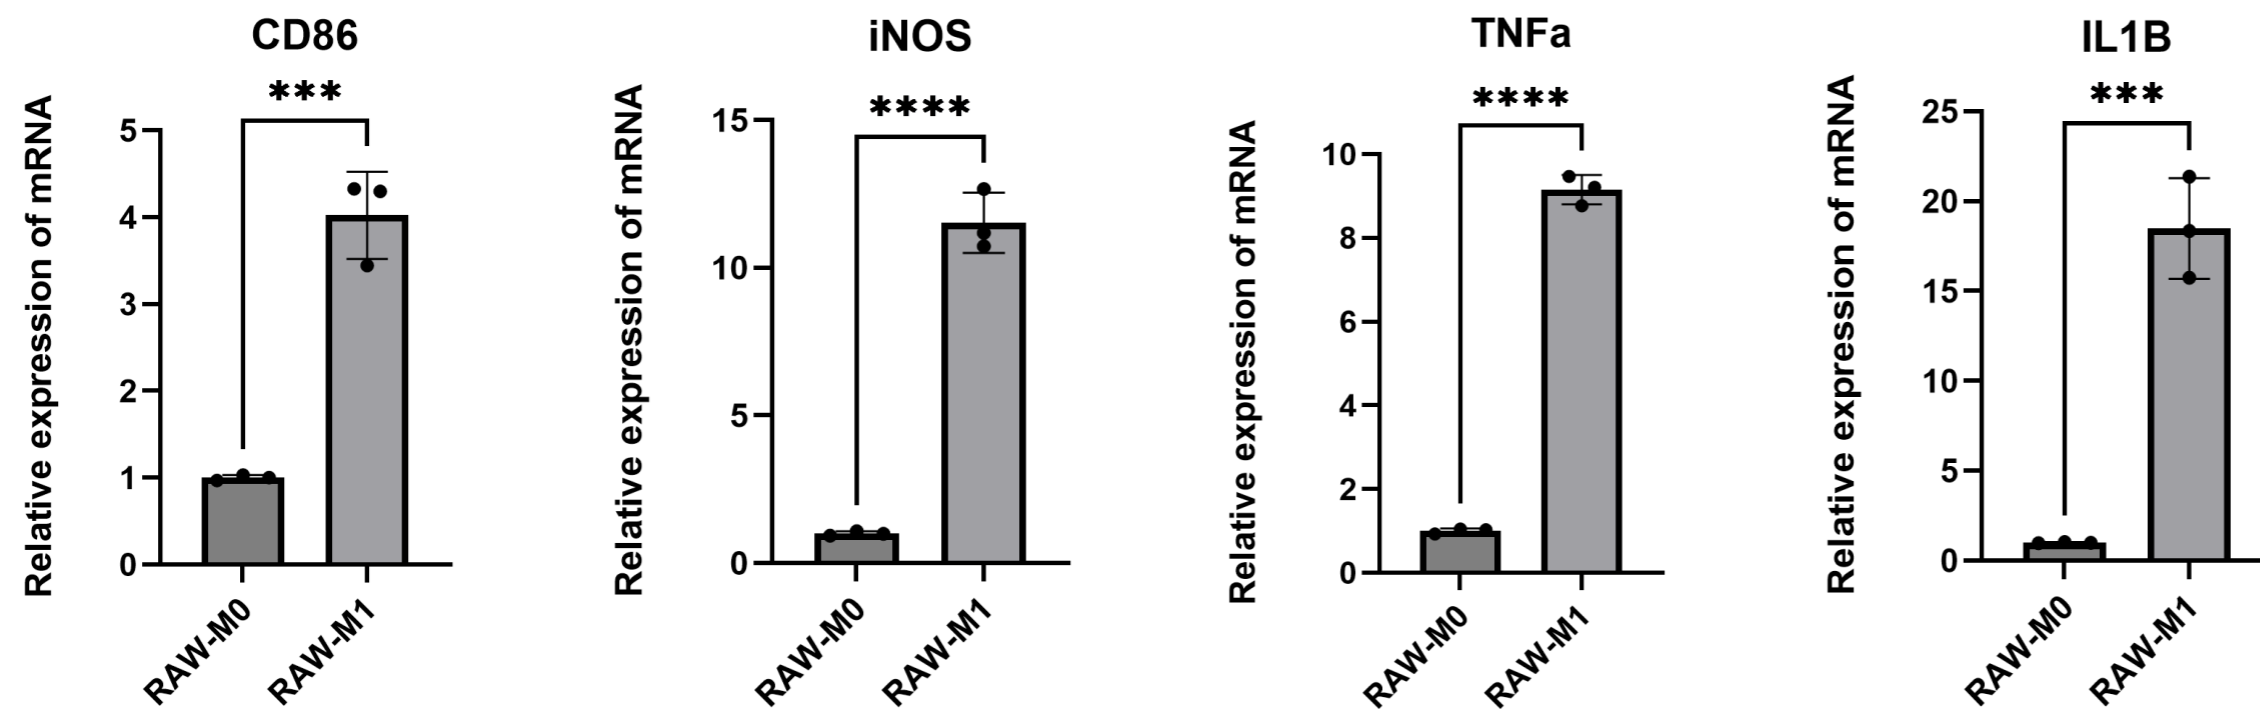

**E.**

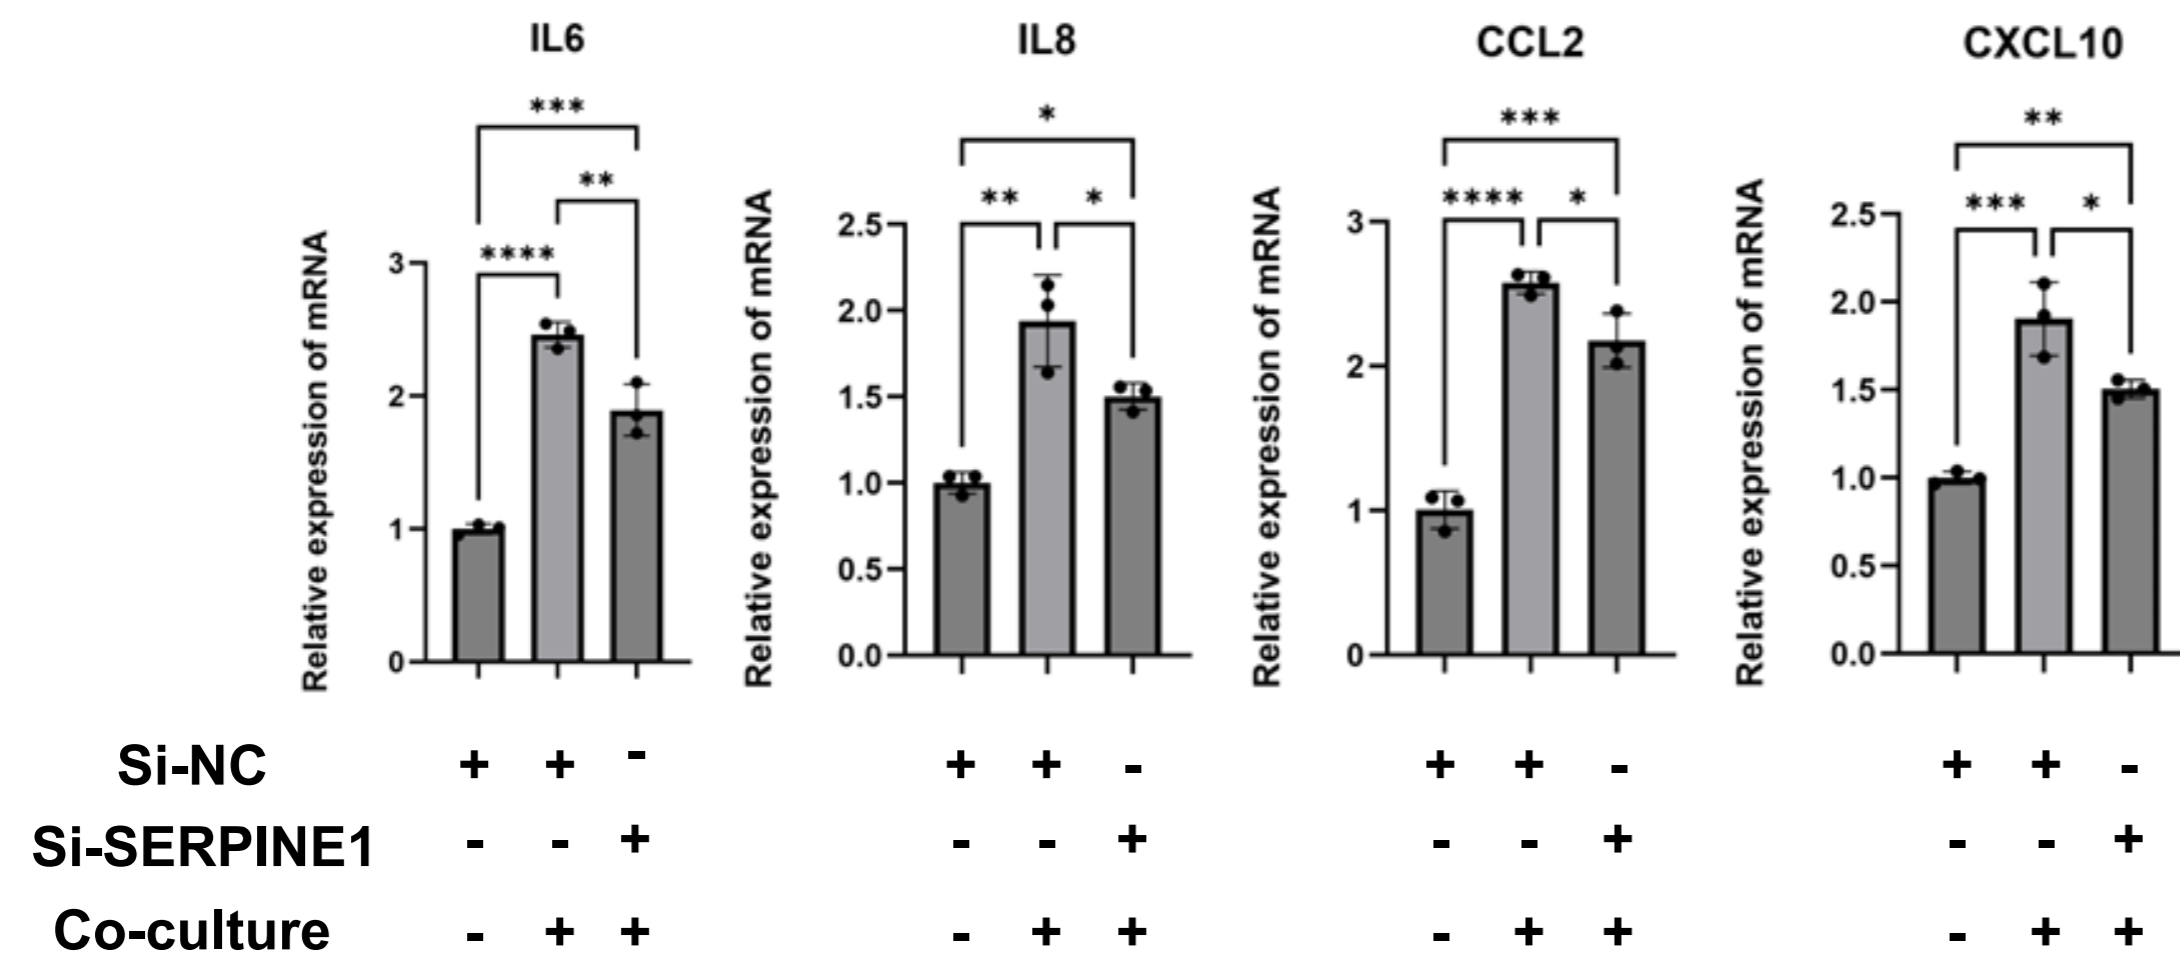

Supplement: Supplementary file 1 [file 146b82731e3ffe40b48f00a9.pdf]

A.

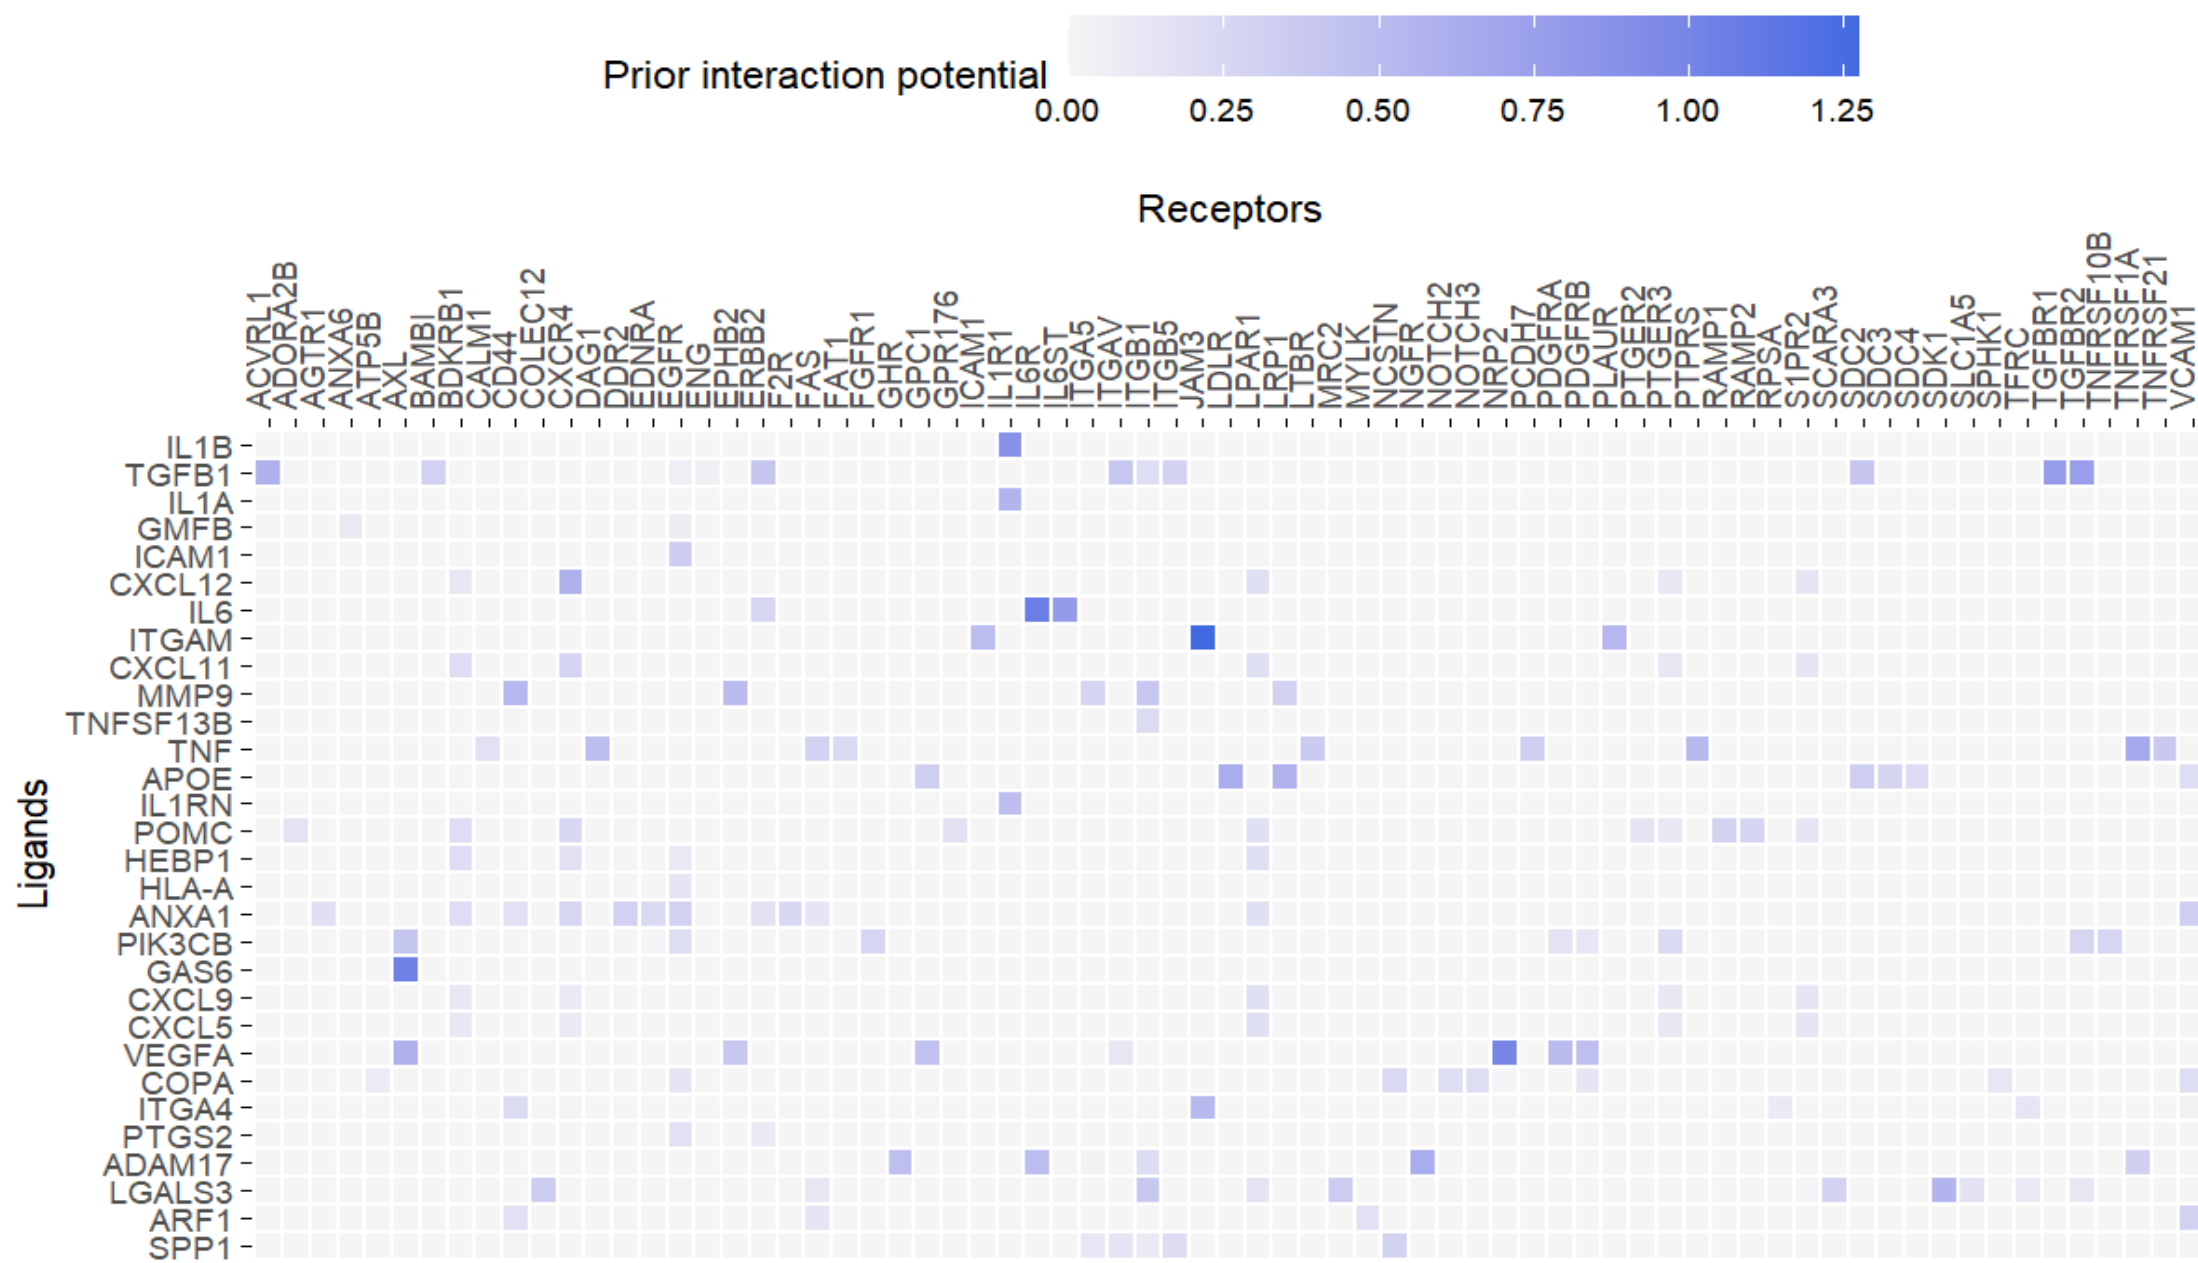

B.

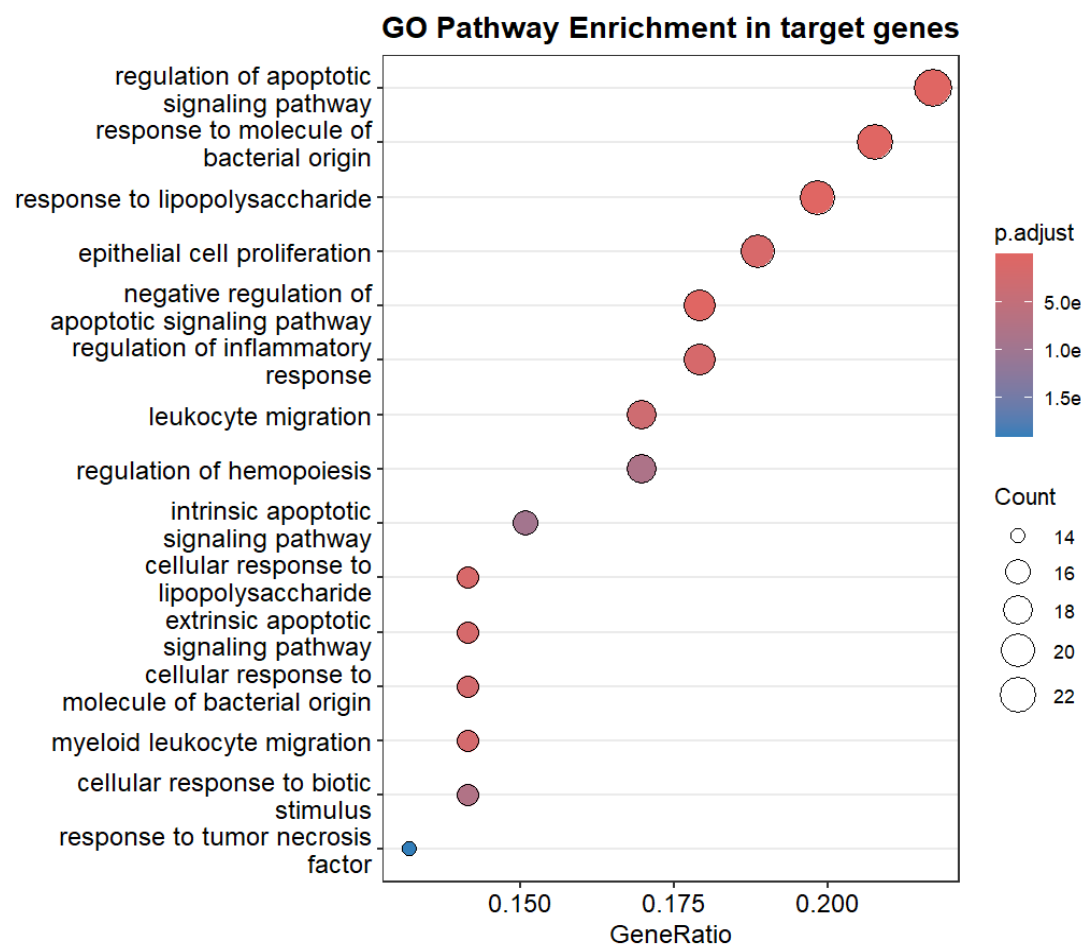

C.

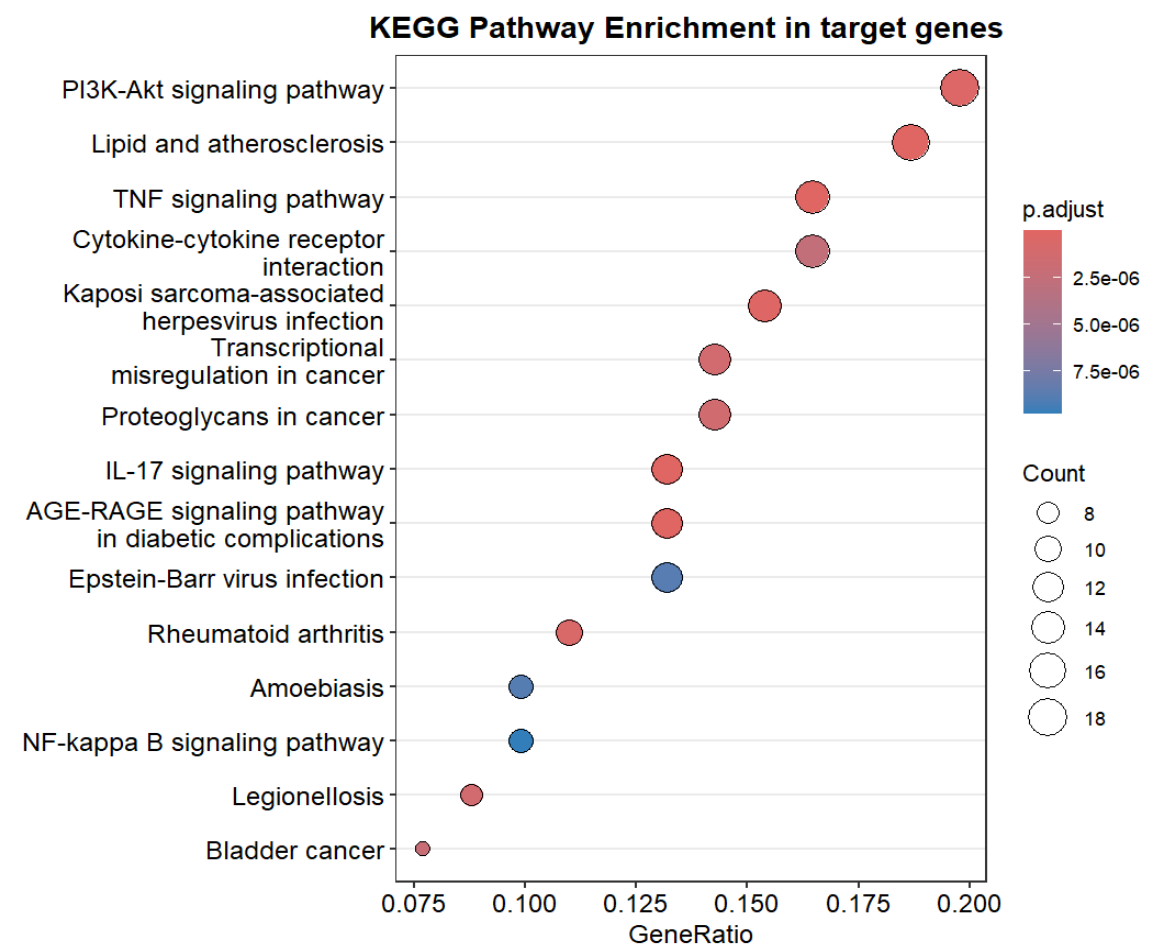

Supplement: Supplementary file 3 [file 5f19391623bdf738af84f890.pdf]

A.

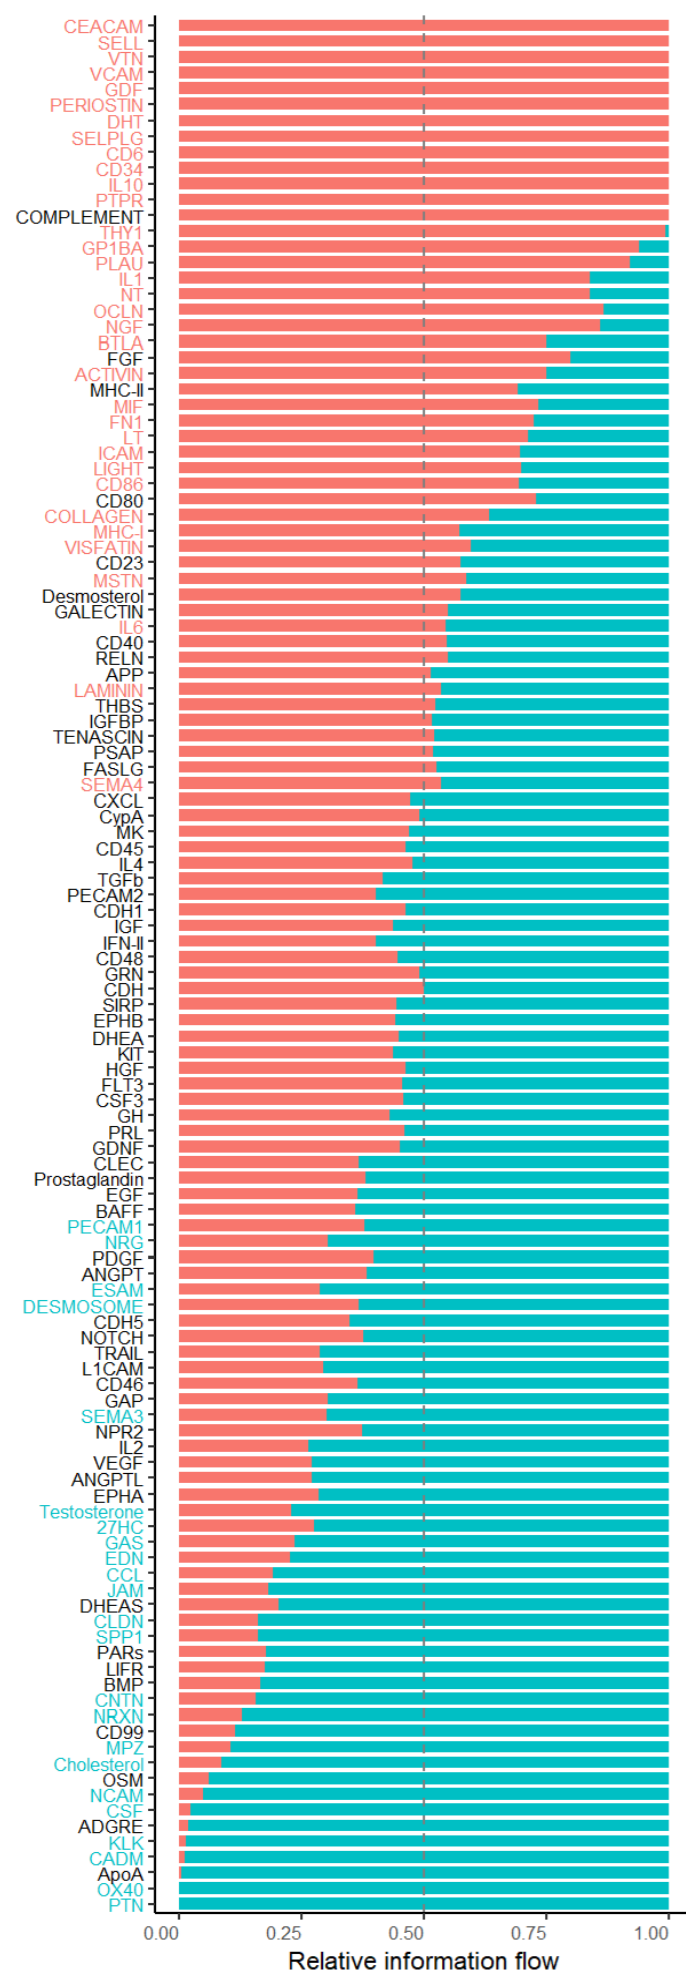

B.

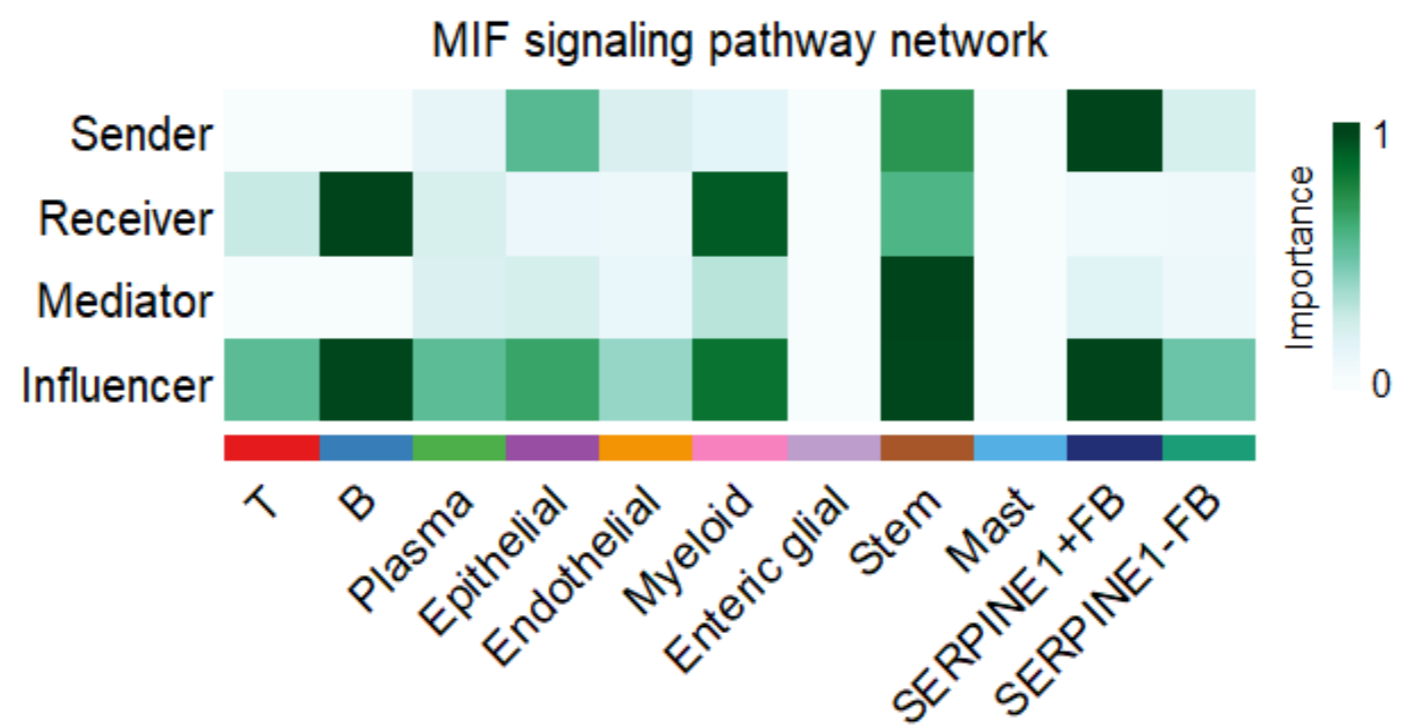

C.

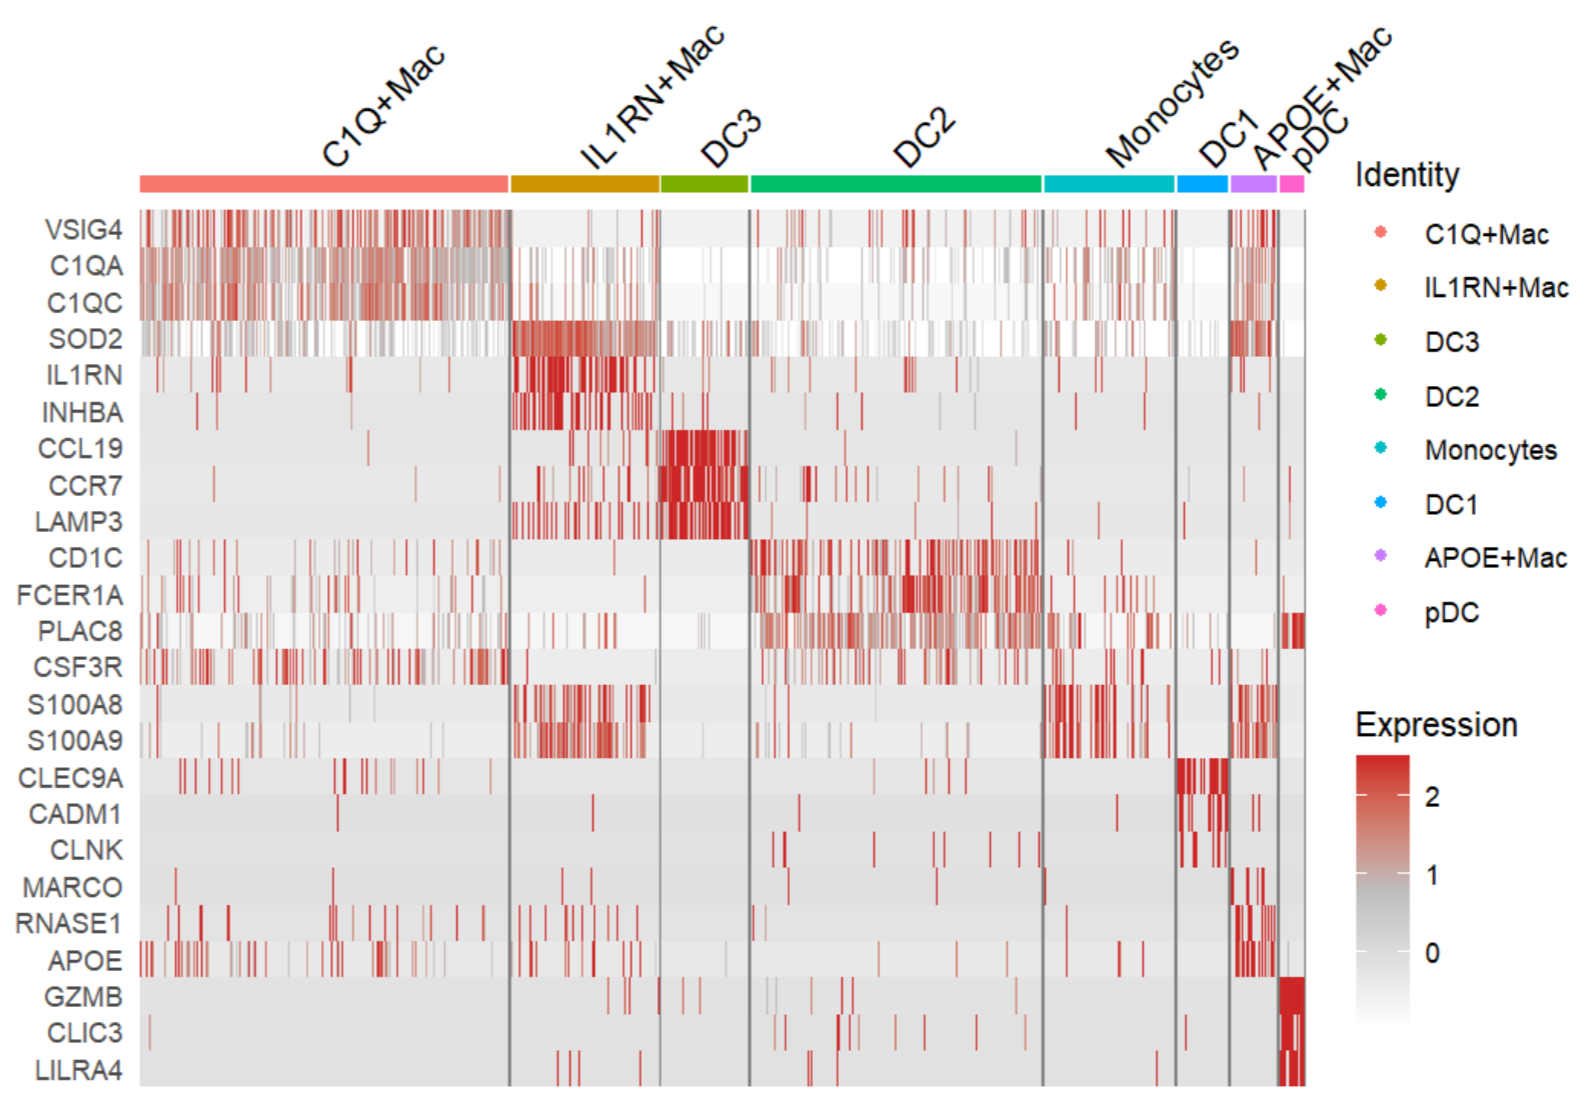

Supplement: Supplementary file 6 [file aca812eb80175d3d03205f8f.pdf]
